1  
2  
3  
4  
5  
6  
7  
8  
9  
10  
11  
12  
13  
14  
15  
16  
17  
18  
19  
20  
21  
22  
23  
24  
25  
26  
27  
28  
29  
30  
31  
32  
33  
34  
35  
36  
37

**Serious harms of the COVID-19 vaccines: a systematic review**

Peter C Gøtzsche & Maryanne Demasi  
Institute of Scientific Freedom, DK-2970 Hørsholm, Denmark

Corresponding author:  
Peter C Gøtzsche  
Institute for Scientific Freedom  
Kløvervang 39  
DK-2970 Hørsholm  
Denmark  
  
pcg@scientificfreedom.dk  
+45 53642066

38 **Abstract**

39

40 *Introduction:* Serious harms of the COVID-19 vaccines have been underreported in  
41 published trial reports.

42 *Methods:* Systematic review of papers with data on serious adverse events (SAEs)  
43 associated with a COVID-19 vaccine.

44 *Results:* We included 18 systematic reviews, 14 randomised trials, and 34 other  
45 studies with a control group. Most studies were of poor quality. The most reliable  
46 one was a systematic review of regulatory data on the two pivotal randomised trials  
47 of the mRNA vaccines. It found significantly more SAEs of special interest with the  
48 vaccines than with placebo, and the excess risk was considerably larger than the  
49 benefit, measured as the risk of hospitalisation. The adenovirus vector vaccines  
50 increased the risk of venous thrombosis and thrombocytopenia, and the mRNA-  
51 based vaccines increased the risk of myocarditis, with a mortality of about 1-2 per  
52 200 cases. We also found evidence of serious neurological harms, including Bell's  
53 palsy, Guillain-Barré syndrome, myasthenic disorder and stroke, which are likely due  
54 to an autoimmune reaction, as has been suggested also for the HPV vaccines. Severe  
55 harms, i.e. those that prevent daily activities, were hugely underreported in the  
56 randomised trials. These harms were very common in studies of booster doses after  
57 a full vaccination and in a study of vaccination of previously infected people.

58 *Discussion:* Serious and severe harms of the COVID-19 vaccines have been ignored or  
59 downplayed, and sometimes been deliberately excluded by the study sponsors in  
60 high impact medical journals. This area needs further study. Authorities have  
61 recommended virtually everyone get vaccinated and receive booster doses. They fail  
62 to consider that the balance between benefits and harms becomes negative in low-  
63 risk groups such as children and people who have already acquired natural  
64 immunity.

65

66

67 **Keywords:** COVID-19 vaccines, serious adverse events, harms

## 68 **1. Introduction**

69

70 Vaccines to prevent SARS-CoV-2 infection were considered to be the most promising  
71 approach for curbing the COVID-19 pandemic. The major drug regulators such as the  
72 US Food and Drug Administration (FDA) and the European Medicines Agency (EMA),  
73 authorised the first COVID-19 vaccines under emergency or conditional use in  
74 December 2020 through accelerated pathways,<sup>1,2</sup> which involved a lower burden of  
75 proof for efficacy and safety than traditional approval pathways.<sup>3</sup> The impression  
76 was that the vaccines were highly effective at preventing infection and severe  
77 disease, as only one severe case of COVID-19 occurred in the vaccine groups  
78 compared with 49 in the control groups in the three pivotal trials from Pfizer,  
79 Moderna and AstraZeneca.<sup>4-6</sup> Governments commenced population-wide  
80 vaccination campaigns immediately, prior to any of the conventional phases of  
81 clinical trials had been completed or any medium or long-term harms could be  
82 elucidated.

83 Serious concerns have been raised about the reliability of the clinical trial data,  
84 partly because the pharmaceutical industry has a history of falsifying data and  
85 deliberately hiding harms.<sup>7</sup> We have documented that incapacitating harms have  
86 been deliberately left out of the published trial reports of the COVID-19 vaccines.<sup>8,9</sup>  
87 However, data from other types of research, mainly pharmacovigilance studies, have  
88 associated thrombosis, myocarditis and the Guillain-Barré syndrome with COVID-19  
89 vaccination.<sup>10</sup>

90 Neither the vaccine manufacturers, nor the drug regulators have allowed  
91 independent researchers access to the raw trial data of the COVID-19 vaccines.<sup>11</sup>  
92 Transparency advocates sued the FDA for access and a court ordered the agency to  
93 release regulatory documents, but not the raw data.<sup>12</sup>

94 We performed a systematic review of the published studies on all types of  
95 COVID-19 vaccines to analyse the risk of serious harms.

96

## 97 **2. Methods**

98

99 We carried out a systematic review of systematic reviews and observational studies  
100 that included data on serious adverse events (SAEs) associated with a COVID-19  
101 vaccine. According to the European Medicines Agency, an SAE is an adverse event  
102 that results in death, is life-threatening, requires hospitalisation or prolongation of  
103 existing hospitalisation, results in persistent or significant disability or incapacity, or  
104 is a birth defect.

105 In clinical trials, drug harms are often divided into mild, moderate, and severe  
106 where severe means preventing usual activity.

107 We noted in our protocol that we might limit the inclusion of reviews and studies  
108 according to methodological rigour or number of patients, if the workload became  
109 excessive. This was the case, and we therefore excluded studies that addressed  
110 special groups of people, e.g. patients with inflammatory bowel disease and  
111 pregnant women; studies based on questionnaires; studies that did not have a  
112 comparator group; and randomised trials and comparative cohort studies that had  
113 less than 1000 participants. We also needed to abandon our aim of reviewing  
114 adverse events lasting at least one year, as the studies did not provide such data.

115

## 116 2.1 *Search strategy and selection of studies*

117

118 We searched PubMed on 4 April 2022 with this strategy: (COVID-19 OR SARS-CoV-2)  
119 AND (vaccin\*) AND (safety OR adverse event\* OR harm\*).

120 One researcher (MD) screened the search results by title and abstract and  
121 excluded articles that clearly did not fulfil our inclusion criteria. Any records where  
122 there was doubt were examined by both researchers. Next, we examined the full  
123 reports for possible inclusion independently, resolving disagreements by discussion.

124

## 125 2.2 *Data management and data extraction*

126

127 We used Zotero to manage the search results and MS Excel and Word to handle the  
128 extracted data. One researcher extracted data, and doubts were resolved by  
129 discussion.

130 We described the risks for adverse events and focused on bias and confounders  
131 in the studies. As we expected huge heterogeneity in the way the studies were  
132 carried out and reported, we aimed primarily at producing a narrative review, which  
133 could be useful for decision making and for planning research.

134

## 135 **3 Results**

136

137 Our search yielded 4,637 records. We initially excluded 4,074 obviously irrelevant  
138 records. After browsing or reading the remaining records, we excluded another 479  
139 records: 242 cohort studies without an adequate control group, 36 comparative  
140 studies with less than 1000 participants, five reports with data included in other  
141 papers, a study of a typhoid vaccine, a small study with a meningococcal vaccine in  
142 the control group, 126 reports of single cases, 61 reports of multiple cases, five  
143 reports with no cases, and two studies based on questionnaires.

144 We also excluded 26 of the 42 systematic reviews we found: 13 (including one  
145 about “safety and efficacy” of the vaccines that included over 100,000 patients from  
146 randomised trials)<sup>13</sup> did not look for serious adverse events or reported that there  
147 were none; three were in pregnancy; one from Wuhan in China did not report SAEs  
148 by treatment group;<sup>14</sup> two were about inflammatory bowel disease; one about eye  
149 diseases; two were not about COVID-19 vaccines; one was a protocol; one was an  
150 autopsy study that established a causal relationship in 15 of 38 deaths;<sup>15</sup> and one  
151 from Hong Kong was unreliable, as it combined data from trials with those from  
152 observational studies and concluded that the 95% confidence intervals did not  
153 indicate a relationship between the vaccines and SAEs, which was incorrect as  
154 several confidence intervals excluded the possibility of no relationship.<sup>16</sup>

155 We included 17 systematic reviews,<sup>17-33</sup> 14 randomised trials,<sup>34-47</sup> and 31 other  
156 studies with a control group.<sup>48-78</sup> Four of these were not identified in our search. A  
157 systematic review<sup>17</sup> and two registry studies<sup>53,78</sup> were published after the cut off for  
158 our search, and a comparative study was provided by a colleague.<sup>66</sup>

159

## 160 3.1 *Serious adverse events in general*

161

162 The most methodologically rigorous, reliable, and relevant research paper we  
163 retrieved was a systematic review conducted by researchers from USA, Spain, and  
164 Australia of regulatory data on the two pivotal randomised trials of the mRNA  
165 vaccines, one from Pfizer and one from Moderna.<sup>17</sup>

166 The review analysed SAEs in general and SAEs of special interest (AESI) according  
167 to the Brighton Collaboration criteria adopted by the WHO.

168 The trials were expected to follow participants for two years. However, within  
169 weeks of the FDA emergency use authorisation, the sponsors began to unblind the  
170 participants and offered the vaccine also to those in the placebo group.<sup>17</sup> Therefore,  
171 the review authors used the interim datasets that were the basis for the emergency  
172 authorisation, covering about 4 months after the trials commenced.

173 The authors included journal publications and SAEs results tables from the  
174 websites of the FDA and Health Canada. Based on blinded tables, two clinicians  
175 judged independently whether an SAE was also an AESI. To account for multiple SAEs  
176 occurring in the same patient, a standard adjustment was used to widen the  
177 confidence intervals.

178 For SAEs, the risk difference was 13.2 per 10,000 vaccinated people (95%  
179 confidence interval -3.2 to 29.6) and the risk ratio was 1.16 (0.97 to 1.39).

180 For SAEs of special interest, the risk difference and the risk ratio were  
181 significantly increased, 12.5 (2.1 to 22.9) and 1.43 (1.07 to 1.92), respectively. The  
182 largest excess risk occurred amongst the Brighton category of coagulation disorders  
183 (36 vs 23 patients). Only 6 vs 6 patients developed myocarditis/pericarditis.

184 Even though the researchers blinded their classifications, critics have claimed  
185 that they should have excluded some events and excluded others. Out of curiosity,  
186 the researchers redid their analyses based on this, which only rendered the results  
187 slightly worse for the vaccines (Peter Doshi, personal communication).

188 The SAEs in the Moderna trial were underreported. For reasons not documented  
189 in the trial protocol, Moderna included efficacy outcomes in its SAEs tabulations,  
190 while Pfizer excluded them.

191 Pfizer's vaccine increased SAEs significantly, risk difference 18.0 per 10,000 (1.2  
192 to 34.9) and risk ratio 1.36 (1.02 to 1.83). In contrast, FDA concluded that SAEs were  
193 "balanced between treatment groups." This discrepancy may in part be explained by  
194 the fact that FDA analysed participants experiencing one or more SAEs because they  
195 had access to individual participant data, whereas the researchers did not, and  
196 therefore analysed total SAEs. Hence, FDA's analysis did not reflect the observed  
197 excess of multiple SAEs in the vaccine group. More importantly, FDA used a different  
198 analysis population with different follow-up windows, which resulted in 126 vs 111  
199 participants with SAEs whereas the researchers found 127 vs 93, also using FDA data.

200 In a follow-up of Pfizer's trial, 24 of the 32 authors were from Pfizer.<sup>34</sup> Even  
201 though the additional data contributed to the full approval of the vaccine in the  
202 United States, there were no numerical data on SAEs in the trial report in *New*  
203 *England Journal of Medicine*, which just noted that no new SAEs "were considered  
204 by the investigators to be related to BNT162b2" and that "No new safety signals  
205 relative to the previous report were observed during the longer follow-up period."  
206 This was highly misleading. The journal article specified that safety would be  
207 evaluated through 6 months after the second dose, but what was published in a  
208 supplement on a website was in violation of Pfizer's own protocol and the study

209 report. The supplement only showed data reported up to one month after the  
210 second vaccine dose. Thus, Pfizer had omitted five months of safety data.  
211 Deliberately hiding harms data could be considered fraud.

212 In a trial of Janssen's vaccine, 19 of the 20 authors were from Janssen.<sup>35</sup> SAEs  
213 occurred in 223 of 21,898 vs 265 of 21,890 patients, and 19 vs 2 patients had SAEs  
214 considered by the investigator to be related to vaccination. The authors noted the  
215 following imbalances in adverse events occurring within 28 days after vaccination:  
216 tinnitus (15 vs 4), urticaria (13 vs 6), convulsion (9 vs 4), pulmonary embolism (10 vs  
217 5), and deep vein thrombosis (11 vs 3). We calculated that the vaccine reduced total  
218 mortality, 28 vs 55 deaths, risk ratio 0.51 (0.32 to 0.80), and COVID-19 related  
219 mortality, 5 vs 22 deaths, risk ratio 0.23 (0.09 to 0.60). The authors found the same  
220 but used person-years as denominators, which is a potentially flawed approach.

221 In a trial of AstraZeneca's vaccine, 101 of 21,587 vs 53 of 10,792 patients had an  
222 SAE within 28 days after a vaccine dose.<sup>36</sup> However, the paper specified that SAEs  
223 would be recorded from "the time of signed informed consent through day 730." As  
224 it is implausible that no one of 32,379 patients would be admitted to hospital for two  
225 years, many SAEs must be missing, not only from the trial report but also in its  
226 supplementary data. There were 7 vs 7 deaths, but yet again, not within two years  
227 but only within 28 days after each vaccination, which could also be considered fraud.  
228 Yet again, in *New England Journal of Medicine*.

229 A trial in India of ZyCoV-D, a DNA-based vaccine, was also highly problematic. It  
230 randomised 27,703 patients, either aged 12-17 years or 60 years and older.<sup>37</sup> A  
231 supplement reported one SAE in the vaccine group and none in the placebo group  
232 among the elderly and one vs two in "comorbid subjects." The main text was totally  
233 different, with no division as per randomised group. It described 15 SAEs, but seven  
234 of these were merely being COVID-19 positive, which is not an SAE and furthermore  
235 belongs to the reporting of the benefits, not the harms. There was one death in each  
236 group. This totally confusing paper was published in *The Lancet*.

237 In a UK trial of a recombinant nanoparticle vaccine (NVX-CoV2373), published in  
238 *New England Journal of Medicine*, there were 41 patients with SAEs of 7,569 in the  
239 vaccine group and 41 of 7,570 in the placebo group.<sup>38</sup> But in another table, the  
240 numbers were 44 vs 44 SAEs.

241 In a US-Mexican trial, also of the NVX-CoV2373 vaccine, a supplement showed  
242 that 228 of 19,729 patients had an SAE in the vaccine group and 128 of 9,853 in the  
243 placebo group.<sup>39</sup> Treatment-emergent systemic adverse events grade 4 within 7 days  
244 (which are life-threatening) were more common in the vaccine group, 17 vs 5 after  
245 first dose and 21 vs 5 after second dose. There was no mention of grade 4 events in  
246 the main text. The trial was published in *New England Journal of Medicine*.

247 An Indonesian trial of inactivated SARS-CoV-2 whole virion vaccine from Sinovac  
248 randomised 1620 people:<sup>40</sup> "there were nine serious adverse events (SAEs) that  
249 occurred in all subjects with a classification not related to vaccine products (five  
250 SAEs)." This unintelligible text was published in *Vaccine*.

251 A Taiwanese trial of a recombinant protein subunit vaccine (MVC-COV1901)  
252 provided no data in the article, which only stated that "No serious adverse events  
253 were considered related to the study intervention."<sup>41</sup> However, in a supplement, 18  
254 of 3295 patients had an SAE on the vaccine and 1 of 549 on placebo. Unsolicited  
255 adverse events grade 3 or above occurred in 93 vs 11 patients. Grade 3 was not

256 defined, but it is commonly defined as being serious and interfering with a person's  
257 ability to do basic things like eat or get dressed. The trial was published in *Lancet*  
258 *Respiratory Medicine*.

259 In an Indian trial of the AstraZeneca vaccine, 12 of 900 patients had an SAE on  
260 the vaccine and 2 of 300 on placebo.<sup>42</sup>

261 Systematic reviews of mainly published trials were of poor quality and found  
262 other results. One from India included both randomised and nonrandomised studies  
263 and did not find an increase in SAEs: 0.7% in the groups treated with the  
264 AstraZeneca vaccine and 0.8% in the control groups.<sup>18</sup> The authors stated that their  
265 search strategy, "(COVID-19 Vaccine)" retrieved 196 records, but when we repeated  
266 it for the same time period, we retrieved 3,371 records. Some of the data were also  
267 erroneous. In a table, the authors stated that there were only 4 SAEs in Pfizer's  
268 pivotal trial,<sup>5</sup> but there were 126 vs 111, which they in the text described as 126 vs  
269 11.

270 A Chinese review did not find an increase in the risk of SAEs, risk ratio 0.94 (0.71  
271 to 1.25), and the vector based vaccines decreased the risk, risk ratio 0.79 (0.63 to  
272 0.99).<sup>19</sup>

273 Another Chinese review only presented data in a supplement, divided by organ  
274 class, with no statistical estimates.<sup>20</sup>

275 A review from Indonesia presented no summary data on SAEs.<sup>21</sup>

276 A review from Canada, of 25 randomised trials and 105,527 patients, only  
277 mentioned three anaphylactic shocks on the vaccine and one on placebo.<sup>22</sup>

278 A US register study of nursing home residents reported lower 7-day mortality  
279 after first vaccination than among unvaccinated people, risk ratio 0.34 (0.22 to 0.54)  
280 but no difference in hospitalisations, risk ratio 0.95 (0.72 to 1.24).<sup>48</sup> These results are  
281 not reliable, as the researchers adjusted for 11 confounders (see Discussion).

282

### 283 3.2 Thromboses

284

285 Most systematic reviews were of poor quality. The Canadian review of randomised  
286 trials mentioned just above described 37 blood clots in the Results section on the  
287 AstraZeneca vaccine, but they did not come from the trials but from 17 million  
288 vaccinated people, which is 0.2 cases per 100,000.<sup>22</sup>

289 A systematic review of non-randomised studies from South Korea identified 664  
290 patients who developed vaccine-associated thrombosis with thrombocytopenia after  
291 an adenovirus vector vaccine.<sup>23</sup> The mean age was 46 years, 70% were females, 91%  
292 had antibodies against platelet factor 4, and 32% died. The pooled incidence of  
293 venous thrombosis after AstraZeneca's vaccine was 28 (12-52) per 100,000 doses, or  
294 130 higher than in the Canadian study. The pooled incidence rate of cerebral venous  
295 thrombosis after the AstraZeneca vaccine was much higher than the background  
296 rate, 23 vs 0.9 per 100,000 person-years.

297 A systematic review from USA, mainly of case reports, identified 144 patients  
298 with thromboembolic events after the AstraZeneca vaccine.<sup>24</sup> The mean age was  
299 21 to 68 years, 65% were females, and 75% had thrombocytopenia. Mean time  
300 for onset of symptoms was 8 days; 50% died. The denominators vary, which makes it  
301 difficult to interpret the review.

302 A systematic review from Pakistan of case reports identified 80 patients with  
303 cerebral venous sinus thrombosis after vaccination.<sup>25</sup> In 83% of cases, the patients  
304 had received an adenovirus vector vaccine. The mean age was 43 years, 74% were  
305 females, and 56% had antibodies against platelet factor 4. Mean time for onset of  
306 symptoms was 11 days; 39% died.

307 Another systematic review from Pakistan of case reports included 65 patients  
308 with thrombosis with thrombocytopenia after vaccination.<sup>26</sup> In 92% of cases, the  
309 patients had received an adenovirus vector vaccine. The mean age was 54 years,  
310 79% were females, and 82% had antibodies against platelet factor 4. Some numbers  
311 were wrong, e.g. 36 of 51 females survived and 15 died but the percentages were  
312 80% and 62.5% respectively. Mean time for onset of symptoms was 9 days; 37%  
313 died.

314 A systematic review from Qatar included mainly case reports but also five  
315 observational studies and one “multinational study.”<sup>27</sup> The authors in- and excluded  
316 studies along the way. We were unable to extract any meaningful data from this  
317 9,641-word long article.

318 In a self-controlled case series study of hospital admissions and deaths based on  
319 UK register data, the risk of thrombocytopenia was increased after the AstraZeneca  
320 vaccine, incidence rate ratio 1.33 (1.19 to 1.47) and after a SARS-CoV-2 infection,  
321 5.27 (4.34 to 6.40).<sup>49</sup> The risk was also increased for venous thromboembolism, 1.10  
322 (1.02 to 1.18) and 13.86 (12.76 to 15.05), respectively, and for cerebral venous sinus  
323 thrombosis, 4.01 (2.08 to 7.71) and 13.43 (1.99 to 90.59), respectively, where the  
324 risk was also increased for Pfizer’s vaccine, 3.58 (1.39 to 9.27).

325 The risk of arterial thromboembolism was increased for Pfizer’s vaccine and after  
326 an infection, 1.06 (1.01 to 1.10) and 2.02 (1.82 to 2.24), respectively. The risk was  
327 also increased for ischaemic stroke, 1.12 (1.04 to 1.20) and 2.00 (1.70 to 2.35) after  
328 an infection, respectively, and for other rare arterial thrombotic events after the  
329 AstraZeneca vaccine, 1.21 (1.02 to 1.43). Censoring the data to the time before  
330 concerns about thrombosis were raised made no difference, and the incidence of  
331 coeliac disease, which was a negative control outcome, did not change.

332 A study from Scotland using a national cohort also found an increased risk of  
333 thrombocytopenia after the AstraZeneca vaccine, adjusted rate ratio 5.77 (2.41 to  
334 13.83), which was confirmed in a self-controlled case series analysis, risk ratio 1.98  
335 (1.29 to 3.02).<sup>50</sup>

336 Indian researchers used the Vigibase for disproportionality analyses but their  
337 methods were doubtful and they did not explain what the COVID vaccines were  
338 compared with.<sup>51</sup> They noted that, “based on IC<sub>025</sub> values, acute myocardial  
339 infarction, cardiac arrest, and circulatory collapse were associated with the vaccine  
340 used in the age group > 75 years.”

341 A UK study used registry data from 8 December 2020 to 18 March 2021, in which  
342 period 21 of 46 million had their first vaccination.<sup>52</sup> The researchers adjusted their  
343 estimates for a total of 30 confounders, and they used lower limb fracture as a  
344 control condition unlikely to be affected by vaccination. However, there were  
345 significantly fewer fractures after vaccination. In the Discussion, the authors mention  
346 six limitations but do not discuss fractures and avoid mentioning that their data on  
347 fractures mean that their data, which were published in *PLoS Medicine*, are  
348 unreliable.



349 Indeed, they were. For example, the authors reported a hugely protective effect  
350 of the AstraZeneca vaccine against venous thrombosis in the elderly (at least 70  
351 years of age), hazard ratio 0.58 (0.53 to 0.63), whereas other research shows that  
352 this vaccine causes thrombosis. Data on all-cause mortality were also implausible,  
353 e.g. a hazard ratio of 0.19 (0.19 to 0.20) after the Pfizer vaccine. It is hard to imagine  
354 that a COVID-vaccine could reduce total mortality by 80% in elderly people, as they  
355 die from so much else.

356 In a European-US register study, the researchers estimated incidence rate ratios  
357 in adults after propensity scores matching and calibration using 92 negative control  
358 outcomes.<sup>53</sup> The statistical methods were highly complex and involved nine  
359 confounders. Compared with Pfizer's vaccine, the AstraZeneca vaccine increased the  
360 risk of thrombocytopenia, rate ratio 1.33 (1.18 to 1.50), risk difference 8.21 (3.59 to  
361 12.82) per 100,000 recipients. The paper is difficult to interpret because there is an  
362 enormous amount of data on various types of thromboses; the data from country to  
363 country are not consistent; there were systematic errors, especially in the US Open  
364 Claims database; and immunisation practices were different. There was no increase  
365 in myocardial infarction.

366 A registry study of Danish frontline workers included data from 27 Dec 2020 to  
367 13 April 2021.<sup>54</sup> Even though people were their own controls, the outcomes were  
368 adjusted for 10 confounders. The AstraZeneca vaccine increased the risk of deep  
369 vein thrombosis, risk difference 8.4 (0.2 to 16.5) per 100,000 vaccinations. The Pfizer  
370 vaccine but not the AstraZeneca vaccine reduced the mortality risk, risk difference -  
371 4.2 (-8.2 to -0.1) and -1.6 (-7.2 to 4.0), respectively. These results are the direct  
372 opposite to those from the randomised trials, where the AstraZeneca vaccine  
373 lowered mortality, risk ratio 0.37 (0.19 to 0.70), which the Pfizer vaccine didn't, risk  
374 ratio 1.03 (0.63 to 1.71).<sup>79</sup> This suggests that when analyses are adjusted for many  
375 confounders, this may ruin the advantage of using people as their own controls.

376 Italian researchers used the EudraVigilance European database to compare the  
377 vaccines from AstraZeneca, Janssen and Pfizer for cardiovascular, neurological, and  
378 pulmonary events.<sup>55</sup> Their paper is uninterpretable. They mistakenly talk about  
379 severe adverse events, abbreviated as SAEs, when the events are serious, which is  
380 worse than just being severe; the issue with confounders didn't even appear in their  
381 10,856 word article; the age was unknown in over half of the people vaccinated; and  
382 they presented large hazard ratios with no confidence intervals.

383 In a similar study by partly the same authors, the risk ratios for cerebral vein  
384 thrombosis, splanchnic vein thrombosis, thrombocytopenia, and other bleeding  
385 events in people at least 65 years of age were 2-7 times higher for the AstraZeneca  
386 vaccine than for the Pfizer vaccine, with narrow confidence intervals.<sup>56</sup> The data  
387 used were those added to data bank until 16 April 2021, before concern was raised  
388 about the AstraZeneca vaccine causing blood clots.

389 The authors noted that while EMA reported only one SAE per million vaccine  
390 doses related to blood clots and thrombocytopenia, they found 151 and 36,  
391 respectively, for the two vaccines, with 13 and 4 deaths possibly related to this. They  
392 also reported that SAEs in the categories "nervous system disorders",  
393 "gastrointestinal disorders" and "musculoskeletal and connective tissue disorders"  
394 occurred 9 times more often with the AstraZeneca vaccine than with the Pfizer

395 vaccine but listed no confidence intervals. Yet again, they called serious events  
396 severe events.

397 In a French registry study of people at least 75 years old where the patients were  
398 their own controls, the researchers wrote that in the first two weeks after each dose  
399 of Pfizer's vaccine, "no significant increased risk was found for any outcome."<sup>57</sup> They  
400 actually found a *decreased* risk after the first dose for ischaemic stroke, relative  
401 incidence 0.90 (0.84 to 0.98) and for pulmonary embolism, 0.85 (0.75 to 0.96).

402 A registry study with US and Indian authors was seriously misleading.<sup>58</sup> The title  
403 was declarative: "Cerebral venous sinus thrombosis is not significantly linked to  
404 COVID-19 vaccines or non-COVID vaccines in a large multi-state health system," but  
405 the study was vastly underpowered and unable to detect anything. There were only  
406 3 cases after Pfizer's vaccine and none after Moderna's vaccine. The abstract was  
407 also totally misleading. There were no numerical data, only a mention of "not  
408 significantly associated."

409 Italian researchers used data on cerebral vein thrombosis reported to the  
410 EudraVigilance database during the first six months of 2021.<sup>59</sup> The reporting rate per  
411 million people who received their first dose of vaccine was 21.6 (20.2 to 23.1) for  
412 AstraZeneca, 11.5 (9.6 to 13.7) for Janssen, 5.6 (4.7 to 6.6) for Moderna and 1.9 (1.7  
413 to 2.1) for Pfizer. Cerebral vein thrombosis occurred alongside thrombocytopenia  
414 with all four vaccines, and the observed to expected ratio was significantly increased  
415 for all four vaccines, also using the highest estimated background incidence. Two  
416 limitations of the study are that the use of the vaccines in various age groups was  
417 not the same throughout Europe and that half of the observation period was after  
418 EMA had raised concern about possible blood clots caused by the adenovirus vector  
419 vaccines.<sup>80</sup>

420 A study from India reported on 89 patients with acute coronary syndrome, 37 of  
421 whom had a prior vaccination history.<sup>60</sup> It is not possible to conclude anything about  
422 possible vaccine harms based on this paper.

423

### 424 3.3 *Myocarditis and pericarditis*

425

426 A systematic review from India included 2184 patients with myocarditis.<sup>28</sup> The mean  
427 age was 26 years, 73% were males, and 99% had received an mRNA-based vaccine.  
428 Mean time for onset of symptoms was 4 days. The paper is difficult to comprehend,  
429 e.g. 1339 patients had definite, probable or possible myocarditis but there were 845  
430 more patients with myocarditis, and the percentage of patients admitted to the  
431 intensive care unit is derived from a denominator of only 1169. Six patients died  
432 among 1317 for which data were available. This is one per 200, which the authors  
433 call "only."

434 A systematic review from Singapore included published articles based on five  
435 vaccine safety surveillance databases and 52 case reports totalling 200 cases of  
436 possible COVID-19 vaccine-related myocarditis.<sup>29</sup> The authors tried to cover too  
437 much ground in one article, which makes it difficult to read, and what they found  
438 was not new and has been better described by other authors.

439 A systematic review with European authors included 129 cases,<sup>30</sup> but cannot be  
440 used for a risk assessment.

441 A systematic review of myocarditis after an mRNA vaccine included data from 69  
442 patients based on case reports and case series.<sup>31</sup> The mean age was 21 years, 93%  
443 were males, and 89% developed symptoms after the second dose. Patients were  
444 admitted to hospital a median of three days post-vaccination.

445 A systematic review from China of children and adolescents included both  
446 randomised trials, observational studies, and case reports.<sup>32</sup> The authors  
447 “summarized the basic information of 27 cases from included studies,” which did not  
448 allow a risk assessment.

449 In a self-controlled case series study of hospital admissions and deaths based on  
450 UK registry data, the AstraZeneca vaccine and the mRNA vaccines increased the risk  
451 of myocarditis, with incidence rate ratios between 1.33 and 1.72, which were lower  
452 than the risk after a SARS-CoV-2 infection, 11.14.<sup>61</sup>

453 The authors confirmed their results in a similar study, which found decreased  
454 risks of cardiac arrhythmia, apart from an increase after the second dose of  
455 Moderna’s vaccine, incidence rate ratio 1.93 (1.25 to 2.96 at 1-7 days).<sup>62</sup> There was  
456 no increased risk of encephalitis, meningitis and myelitis after the vaccines from  
457 AstraZeneca and Pfizer, 1.07 (0.87 to 1.31) and 1.14 (0.86 to 1.51), respectively,  
458 whereas infection increased the risk, 2.07 (1.78 to 4.11).

459 A French disproportionality study of myocarditis and pericarditis after an mRNA  
460 vaccine reported to VigiBase, the WHO’s pharmacovigilance database, included data  
461 till 30 June 2021.<sup>63</sup> Compared with older patients, myocarditis was much more  
462 commonly reported in young people; the reporting odds ratio (ROR) was 22.3 (19.2  
463 to 25.9) for adolescents and 6.6 (5.9 to 7.5) for 18–29 years old. Myocarditis was also  
464 much more common in males, ROR 9.4 (8.3 to 10.6). Median time to onset was 3  
465 days for myocarditis and 8 days for pericarditis; 21% of the cases were life-  
466 threatening, and 1% died. The estimated rate of myocarditis was 3.6 (3.3 to 3.9) per  
467 100,000 fully vaccinated persons in the United States, and 7.8 (6.9 to 8.9) in young  
468 adults.

469 A US study using the Vaccine Adverse Event Reporting System (VAERS) found that  
470 patients with myocarditis after an mRNA vaccine reported between December 2020  
471 and August 2021 had a median age of 21 years and that 82% were males.<sup>64</sup> The  
472 incidence in young males was over 10 times higher than in middle-aged males, and  
473 82% of cases occurred after the second vaccination. The reporting rates in young  
474 adults were 30 times higher than the expected background rate. Glucocorticoids  
475 were used in 12% of the patients, but the most common treatment was nonsteroidal  
476 anti-inflammatory drugs, used in 87% of the patients. This is surprising because  
477 these drugs, despite their name, have no anti-inflammatory properties<sup>81-83</sup> and  
478 increase the risk of heart attacks and death.<sup>7</sup>

479 Another US VAERS study, with US and Chinese authors, came to different results  
480 even though it used the same observation period.<sup>65</sup> The adverse event rate in  
481 adolescents was three times higher than in the former study, which cannot be  
482 explained by inclusion also of pericarditis and by having no 7-day limit for reporting.  
483 Most cases occur within the first couple of days and myocarditis is diagnosed about  
484 10 times as often as pericarditis.<sup>65</sup> The risk was greater for Pfizer’s vaccine, ROR 5.4  
485 (4.1 to 7.0) than for Moderna’s, ROR 2.9 (2.2 to 3.8), but, as the authors noted, only  
486 Pfizer’s vaccine was approved for use in minors where the risk is greatest, and the  
487 risks were similar in other age groups.

488 The authors wrote that Janssen’s vaccine “was not associated with signals of  
489 myocarditis/pericarditis.” This statement is extremely misleading. First, even though  
490 few people received this vaccine, the estimate was very close to being statistically  
491 significant, ROR 1.39 (0.99 to 1.97), which is surely a signal. Second, Janssen’s  
492 vaccine was only approved for adults. Third, the authors wrote that the incidence  
493 rate was higher after the mRNA vaccines than after viral vector vaccines, but they  
494 reported that these rates were 5.98 (5.73 to 6.25) vs 5.64 (4.46 to 7.04) per million,  
495 which are similar rates, and the confidence interval for Janssen’s vaccine includes  
496 the whole confidence interval for the mRNA vaccines. We looked up if the authors  
497 had a conflict of interest related to Janssen, but they declared they had none.

498

### 499 3.4 *Inflammatory neuropathies*

500

501 In the randomised trials, there were seven cases of Bell’s palsy among people  
502 receiving an mRNA vaccine versus one among placebo recipients ( $P = 0.07$ ), and the  
503 incidence rate was 3.5-7 times higher than the background rate.<sup>69</sup>

504 This signal was also found in a self-controlled case series study of hospital  
505 admissions based on UK register data.<sup>66</sup> There was an increased risk of Bell’s palsy,  
506 incidence rate ratio 1.29 (1.08 to 1.56), Guillain-Barré syndrome, 2.90 (2.15 to 3.92),  
507 and myasthenic disorder 1.57 (1.07 to 2.30) with the AstraZeneca vaccine. Pfizer’s  
508 vaccine increased the risk of haemorrhagic stroke, 1.38 (1.12 to 1.71). The risk of  
509 neurological outcomes was also increased after infection with SARS-CoV-2. There  
510 were 4 excess cases of Guillain-Barré syndrome per million people receiving the  
511 AstraZeneca vaccine and 15 excess cases after an infection.

512 No such signals were found in a study using data from primary care records in the  
513 UK and Spain, not even in a series of self-controlled cases of Bell’s palsy.<sup>67</sup> The risks  
514 for Bell’s palsy, Guillain-Barré syndrome, and encephalomyelitis were lower than  
515 expected background rates or about the same for the vector based and mRNA  
516 vaccines.

517 A case-control study from Israel with 37 cases of facial nerve palsy did not find an  
518 association to Pfizer’s vaccine, odds ratio 0.84 (0.37 to 1.90).<sup>68</sup>

519 An Israeli register study of Pfizer’s vaccine compared the rates of Bell’s palsy with  
520 background rates.<sup>69</sup> The standardised incidence ratio after the first dose was 1.36  
521 (1.14 to 1.61). This is a weak signal in a study with a historical control. Expected  
522 cases cannot be determined with sufficient precision and they vary over time. The  
523 signal was even weaker after the second dose, 1.16 (0.99 to 1.36). In elderly females  
524 where the strongest association was observed in this study, the excess risk of Bell’s  
525 palsy was estimated to be 5 cases per 100,000 vaccinees.

526 Another Israeli register study matched vaccinated with unvaccinated people for  
527 seven factors and adjusted for socioeconomic status for which matching was poor.<sup>70</sup>  
528 Pfizer’s vaccine did not increase the occurrence of Bell’s palsy, risk ratio 0.96 (0.54 to  
529 1.70) or Guillain-Barré syndrome (1 vs 0 cases), whereas there were more cases of  
530 numbness or tingling, risk ratio 1.22 (1.08 to 1.37).

531 Using Vigibase for disproportionality analyses, Swiss researchers found *lower*  
532 risks for COVID-19 vaccines than for other viral vaccines for neuralgic amyotrophy,  
533 ROR 0.23 (0.17 to 0.30) vs 0.12 (0.09 to 0.16), and for Guillain-Barré syndrome, ROR

534 0.15 (0.13 to 0.16) vs 0.06 (0.05 to 0.06).<sup>71</sup> In contrast, Bell's palsy was more  
535 frequently reported with COVID-19 vaccines, ROR 1.12 (1.07 to 1.17).

536 Indian researchers also used Vigibase for disproportionality analyses, but their  
537 methods and conclusions were doubtful.<sup>72</sup> They referred to IC<sub>025</sub> values without  
538 explaining what it meant and did not state what the COVID vaccines were compared  
539 with. They listed 52 neurological diagnoses, which they "considered to be associated  
540 with the administration of the vaccine."

541 A systematic review from Kuwait and Egypt was also problematic, e.g. there was  
542 no reproducible search strategy,<sup>33</sup> which is essential for systematic reviews. The  
543 authors reported on 32 cases of CNS demyelination following various COVID-19  
544 vaccines.

545 A study based on 555 reports in VAERS of hearing loss did not find an increase in  
546 risk, compared to the background rate.<sup>73</sup>

547

### 548 3.5 *Serious adverse events in people with previous infection*

549

550 In an Israeli study, Pfizer's vaccine was given to 78 people with a previous COVID-19  
551 infection and to 177 matched controls.<sup>74</sup> Some numbers and percentages are  
552 erroneous. Emergency department visit or hospitalisation was required for 5 (6%) vs  
553 1 patients (0.6%). Even though the authors showed in a table that this difference was  
554 statistically significant (P = 0.01), they concluded that the vaccine was safe in people  
555 with previous infection. This is not correct. Hospitalisation is a serious harm, and  
556 harms occurred ten times as often if the patients had been infected earlier,  
557 suggesting that those with acquired immunity are at higher risk of experiencing SAEs  
558 post vaccination.

559

### 560 3.6 *Serious adverse events after a booster dose*

561

562 In a US study, 305 people previously vaccinated with two doses of 100 µg of Pfizer's  
563 vaccine received a third, booster dose and were compared with the second dose of  
564 the vaccine in 584 historical controls and with a 50 µg booster in separate studies.<sup>75</sup>

565 The 100 µg booster caused more local and systemic adverse reactions than the  
566 second 100 µg vaccine dose and the 50 µg booster. A supplement showed that there  
567 was a large difference for moderate or severe solicited systemic adverse reactions;  
568 59% experienced this on the 100 µg booster vs 39% on the 50 µg booster (P =  
569 0.000,05, our calculation). There was no such difference between the 100 µg booster  
570 and the 100 µg second dose, 59% vs 54% (P = 0.12).

571 There were two serious adverse events (not six, as the authors claim, as the  
572 other four were asymptomatic infections with positive tests) but no information  
573 about which groups they came from.

574 In another US study, the patients used v-safe, a voluntary, smartphone-based  
575 safety surveillance system developed by the Centers for Disease Control and  
576 Prevention to provide information on adverse reactions after vaccination.<sup>76</sup> The  
577 occurrence of adverse reactions was very similar for dose three and dose two (99.7%  
578 of the doses were mRNA vaccines). There were many severe adverse events: 28%  
579 were unable to perform normal daily activities after the booster; 11% were unable  
580 to work or attend school; 0.2% had an emergency visit; and 0.1% were hospitalised.

581 In a US study of Pfizer's vaccine, organised by Pfizer, patients were randomised  
582 to receive a third dose or placebo.<sup>43</sup> The study was published in *New England Journal*  
583 *of Medicine*, and 24 of the 32 authors were from Pfizer or hired by Pfizer. After a  
584 third dose, 16 of 5,055 patients had an SAE on the vaccine and 24 of 5,020 on  
585 placebo.

586 In contrast, in a self-controlled case series study of hospital admissions based on  
587 UK registry data, the risk of myocarditis was increased after a booster dose of  
588 Pfizer's vaccine, incidence rate ratio 1.72 (1.33 to 2.22).<sup>61</sup>

589 A UK study of 2,878 people was uninterpretable, as they were randomised to 12  
590 different groups including a meningococcal vaccine and as there were only 24  
591 SAEs.<sup>44</sup>

592

### 593 3.7 *Serious adverse events in children*

594

595 We found three randomised trials with data on SAEs in children. In all cases, the data  
596 were hidden in supplements to the article. In two trials of mRNA vaccines, 6 of 2486  
597 vs 2 of 1240 children 12-17 years of age and 4 of 1131 vs 1 of 1129 children 12-15  
598 years of age had SAEs, respectively.<sup>45,46</sup> In a trial of a Chinese attenuated virus, the  
599 term SAEs was not used but the numbers for grade 3 reactions were 1 of 251 vs 0 of  
600 84 in children 6-12 years of age.<sup>47</sup> The pooled risk ratio for these three trials was 1.90  
601 (0.57 to 6.29,  $P = 0.29$ ,  $I^2 = 0$ ).

602

### 603 3.8 *Other issues*

604

605 Appendicitis has been suggested as a possible adverse because of a numerical  
606 increase in a vaccine trial.<sup>53f</sup> A US study reviewed cases of appendicitis reported to  
607 VigiBase and found 358 cases compared to 329 expected cases.<sup>77</sup> We explored this  
608 and found a Danish registry study that reported an adjusted risk ratio of 0.93 (0.79 to  
609 1.11) after the first dose and 0.99 (0.84 to 1.18) after the second dose of the  
610 suspected agent, an mRNA vaccine.<sup>78</sup>

611

## 612 4 Discussion

613

614 Our systematic review demonstrates the difficulty of determining vaccine related  
615 SAEs in published trial data. Theoretically, systematic reviews of randomised trials  
616 should be the most reliable source of evidence, but serious harms are vastly  
617 underreported, if reported at all, in published drug trials.<sup>7</sup>

618 The underreporting seems to be particularly pronounced in vaccine trials.<sup>8,9,84</sup> For  
619 the COVID-19 vaccines, there is the additional problem that, within weeks of the  
620 vaccines receiving an emergency use authorisation, when far too little time had  
621 elapsed to identify late occurring or diagnosed harms, the unblinding of trials  
622 commenced and placebo recipients were offered the vaccine.<sup>85</sup>

623 The safety of vaccines is important because they are preventive, but editors of  
624 our most prestigious journals chose to relegate the data on serious harms to  
625 supplements, which few readers will access, particularly if they read the paper  
626 version.

627 Severe harms – which are defined as those preventing usual activity – have also  
628 been vastly underreported in the published trial reports. Pfizer’s pivotal trial report,  
629 published in *New England Journal of Medicine*, was highly misleading.<sup>5</sup> It mentioned  
630 only serious adverse events considered related to the vaccine: four in the vaccine  
631 group and none in the placebo group, but, according to FDA, there were 126 vs 111  
632 SAEs.<sup>17</sup> Pfizer’s article was also obscure for severe adverse events. A supplement  
633 showed that 240 patients (1.1%) had severe events on the vaccine versus 139 (0.6%)  
634 on placebo. Pfizer did not provide a P-value, but  $P = 2 \times 10^{-7}$ . The number needed to  
635 vaccinate to harm one patient severely was only 200, which Pfizer’s article said  
636 nothing about, only that “The safety profile of BNT162b2 was characterized by short-  
637 term, mild-to-moderate pain at the injection site, fatigue, and headache.”

638 In AstraZeneca’s trials, 86% of the controls did not receive placebo but another  
639 vaccine,<sup>4</sup> which means that the harms of its COVID-19 vaccine cannot be estimated,  
640 as all vaccines cause harms. The pivotal trial report noted that serious adverse  
641 events were less common after the COVID-19 vaccine than after the control vaccine,  
642 79 vs 89 patients.<sup>4</sup> The rate of severe adverse events was 1% but the first 14  
643 employees at the department of clinical microbiology at Rigshospitalet in  
644 Copenhagen where the spouse to one of us works became so ill after the  
645 AstraZeneca vaccine that all of them required a sick leave. The discrepancy between  
646 100% in practice and 1% in the report in *The Lancet* is so huge that we suspect  
647 AstraZeneca committed fraud in its vaccine trials. The harms were so pronounced  
648 and common that Denmark stopped using the AstraZeneca vaccine.

649 The mRNA vaccines can also cause severe harms. As noted above, many people  
650 were unable to perform normal daily activities after a booster with an mRNA  
651 vaccine.<sup>76</sup>

652 By far the most reliable study we identified was the systematic review that used  
653 regulatory data from the two pivotal randomised trials of the mRNA vaccines and  
654 restricted the observation period to reduce the contamination caused by offering  
655 the vaccine to patients in the placebo group.<sup>17</sup> The researchers put their findings into  
656 perspective by comparing them with hospitalisations. The excess risk of SAEs of  
657 special interest was considerably larger than the reduced risk of hospitalisation, 10.1  
658 vs 2.3 per 10,000 vaccinated people for Pfizer’s vaccine, and 15.1 vs 6.4 for  
659 Moderna’s vaccine. Even after the researchers adjusted for multiple events in the  
660 same patient in a sensitivity analysis, the risk was larger.

661 Serious adverse events are not directly comparable to hospitalisations. They are  
662 rarely lethal whereas a reduction in hospitalisations would be expected to reduce  
663 mortality. On the other hand, the lower the risk of dying, the more important the  
664 serious harms are of the vaccine. These findings are therefore important for  
665 considerations about whether vaccination should be recommended for young  
666 people.

667 Another low-risk group involves people who have already been infected with  
668 SARS-COV-2 and recovered, and therefore have acquired natural immunity. The  
669 issue of whether to vaccinate such people is highly pertinent since most of the  
670 vaccine related harms have been attributed to over-activation of the immune  
671 system.<sup>74</sup> In the only study we found of this, severe harms, defined as emergency  
672 department visit or hospitalisation, occurred ten times more often if the patients  
673 had been infected earlier.<sup>74</sup> Even though it was an observational study, this finding

674 raises serious concerns about the ubiquitous recommendations to also vaccinate  
675 people who have had a COVID-19 infection.

676 The vast majority of our populations, those who have been vaccinated, constitute  
677 another low-risk group. In the autumn of 2021, booster doses were being  
678 recommended,<sup>86,87</sup> and in many cases mandated, worldwide. However, while it was  
679 generally accepted that the vaccines were still protective against COVID-19  
680 hospitalisations, it was evident that protection against infection waned quickly.<sup>88</sup>

681 The data underpinning the authorisation of booster doses were based on inferior  
682 observational and immune-bridging studies, and there was great uncertainty and  
683 confusion. In December 2021, EMA recommended boosters as frequently as every  
684 three months,<sup>89</sup> but in an extraordinary backflip only one month later warned that  
685 repeated boosters might weaken people's immune responses.<sup>90</sup> This has been  
686 shown to be the case for influenza vaccines. Canadian researchers, who replicated  
687 their findings in three different studies, found that people who received a seasonal  
688 influenza vaccine had an increased risk of getting infected with another strain the  
689 following year.<sup>91</sup>

690 For observational studies, the main problem is confounding. In a little known but  
691 ingenious study, a statistician used raw data from two randomised multicentre trials  
692 as the basis for observational studies that could have been carried out.<sup>92</sup> He showed  
693 that the more variables that are included in a logistic regression, the further we are  
694 likely to get from the truth. He also found that comparisons may sometimes be *more*  
695 biased when the groups appear to be comparable than when they do not; that  
696 adjustment methods rarely adjust adequately for differences in case mix; and that all  
697 adjustment methods can on occasion increase systematic bias. He warned that no  
698 empirical studies have ever shown that adjustment, on average, reduces bias.<sup>92</sup>

699 Another main problem is underreporting, particularly when doctors have been  
700 reassured by authoritative messages that the vaccines are safe. In addition, there is a  
701 fear among doctors that they can be threatened with disciplinary action if they do  
702 anything that could undermine the government's COVID-19 vaccine rollout. We have  
703 had contact with a junior doctor working in the emergency department of a major  
704 hospital who began noticing patients being rushed in with what he suspected to be  
705 serious COVID-19 vaccine injuries. His colleagues dismissed the symptoms as  
706 unrelated to the vaccine, but he felt his patients' observations were valid. He  
707 decided to write up a report and submit it to the drug regulator but was discouraged  
708 by his head of the department as there was no protocol in place for reporting  
709 vaccine injuries. Moreover, as many doctors are stressed and overworked and do  
710 not have time to fill out the paper work, very little gets reported.

711 Underreporting is prevalent when the event is common in the general  
712 population, e.g. thrombosis in the elderly. Overreporting can also occur, e.g. because  
713 of increased attention related to a particular harm. In mid-March 2020, EMA warned  
714 about blood clots possibly being caused by the AstraZeneca vaccine,<sup>80</sup> but the  
715 warning was downplayed so much that it was unlikely to inflate reports about  
716 vaccine injuries. EMA not only stated that "the vaccine is not associated with an  
717 increase in the overall risk of blood clots" but even that there had been *fewer*  
718 thromboembolic events than expected, both in studies before licensing and in  
719 reports after rollout of vaccination campaigns. However, EMA also noted that there



720 had been 12 cases of cerebral venous sinus thrombosis and that only 1.4 cases was  
721 expected.

722 It is pretty unreliable to estimate expected rates. A register study found that the  
723 incidence of deep vein thrombosis in women aged 35-54 years was five times higher  
724 in USA than in Spain.<sup>93</sup> The researchers also observed large variations between  
725 electronic health records and claims data sources when using the same analysis and  
726 outcome definitions. Other studies have reported a 10-fold difference in rates of  
727 transverse myelitis; a 38 times higher rate of Bell's palsy in USA than in Italy; and a  
728 12-fold to a 190-fold difference in rates of narcolepsy between USA and Europe.<sup>93</sup>

729 Many of the studies we reviewed were of very poor quality and published in  
730 journals that failed to identify fundamental errors. In 2021, for example, *Vaccines*  
731 (distinct from the respected journal *Vaccine*) published an article claiming that  
732 COVID-19 vaccines kill about as many as they save, but the authors made the basic  
733 error of assuming that all reported deaths following vaccination in  
734 pharmacovigilance data are caused by the vaccine.<sup>94</sup> Tensions after its publication  
735 led to the resignation of six editors and the article was retracted a week later.<sup>95</sup>

736 Another example, from the same journal, was an abstract from an article we  
737 excluded, which noted that "about 50.88%" reported side effects.<sup>96</sup> It was not  
738 "about," but precisely 50.88%, and one should not give two decimals. We calculated  
739 that the confidence interval is 47% to 55%. Furthermore, the harms were divided  
740 into mild, moderate, and severe, where mild meant lasting less than 24 hours,  
741 moderate from 24 to 72 hours, and severe more than a week. There was no category  
742 for harms lasting more than 3 and less than 8 days, and duration it not a sign of  
743 severity. A mild harm can last for weeks, and a life-threatening harm can disappear  
744 in a few minutes, e.g. an anaphylactic shock.

745 A systematic review used the Jadad 5-point scale for scoring the "quality" of the  
746 randomised trials.<sup>22</sup> The authors claimed to have adhered to the PRISMA guidelines,  
747 but these say that "scales that numerically summarise multiple components into a  
748 single number are misleading and unhelpful."<sup>97</sup> The Jadad scale has not been  
749 recommended for the last 25 years. This review was also published in *Vaccines*.

750 Despite their shortcomings, we can draw some firm conclusions based on the  
751 studies we reviewed.

752 The adenovirus vector vaccines increase the risk of venous thrombosis and  
753 thrombocytopenia whereas we did not find reliable data in our search to suggest  
754 that COVID-19 vaccines increase the risk of arterial thrombosis. However, this area  
755 develops quickly. Our search on 4 April 2022 identified 4637 records but this number  
756 had increased by 2816 already on 2 December. A colleague notified us of a recent  
757 Israeli register study that raises concerns.<sup>98</sup> It found an increase of over 25% in  
758 people aged 16-39 years in both cardiac arrest and acute coronary syndrome that  
759 was closely related to vaccination rates whereas there was no relation to COVID-19  
760 infection rates. A so-called Reuters Fact Check concluded that their study was  
761 misleading because it did not prove that this increase was caused by the vaccines.<sup>99</sup>  
762 However, these researchers stated clearly in their paper that they had not  
763 established a causal relationship.

764 Infections and vaccines, e.g. against smallpox,<sup>100</sup> can cause myocarditis, which is  
765 also the case for mRNA-based COVID-19 vaccines, particularly in young males. The  
766 mortality is about 1-2 per 200 cases.<sup>28,63</sup>

767 Based on biological plausibility and temporal association, inflammatory  
768 neuropathies like neuralgic amyotrophy, Bell's palsy, and the Guillain-Barré  
769 syndrome, have been linked to other vaccines, most often to the influenza vaccine.<sup>71</sup>  
770 The mounting cases of the Guillain-Barré syndrome in 1976 were closely related to  
771 the use of a swine influenza vaccine.<sup>101</sup> However, serious neuropathies can be very  
772 difficult to detect. For example, it took a long time before it was accepted that the  
773 influenza vaccine Pandemrix causes narcolepsy.<sup>102,103</sup>

774 When our research group analysed the clinical study reports of the HPV vaccines  
775 submitted to EMA for marketing authorisation, we showed a statistically significant  
776 increase in serious neurological adverse events.<sup>104</sup> EMA denied this but based its  
777 conclusion on the data provided to the agency by the manufacturers. They did not  
778 check if this reporting was accurate despite knowing that one of the companies had  
779 previously been deceptive with its HPV vaccine harms data.<sup>9,105</sup>

780 We found evidence of serious neurological harms, and a survey of 508 US  
781 patients suffering from persistent neurological symptoms after a COVID-19 vaccine  
782 showed a wide array of symptoms of which painful neuropathy/paraesthesias were  
783 the worst.<sup>106</sup> Prior to the vaccination, 94% of the patients had never reacted to a  
784 vaccine. Since the symptoms are so varied, doctors tend to dismiss them and  
785 conclude that the patients suffer from a psychiatric problem. However, this is  
786 unlikely. Researchers from the US National Institutes of Health studied 23 self-  
787 referred patients who reported new neuropathic symptoms beginning within three  
788 weeks after SARS-CoV-2 vaccination (for 9 patients, after the second dose).<sup>107</sup> All  
789 patients had sensory symptoms comprising severe face or limb paraesthesias, and 12  
790 had objective evidence of small-fiber peripheral neuropathy. Autonomic testing in 12  
791 identified 7 with reduced distal sweat production and 6 with postural orthostatic  
792 tachycardia syndrome.

793 Some patients have experienced similar symptoms after an HPV vaccine, which  
794 suggests autoimmunity directed against the autonomic nervous system. In a Danish  
795 study, antibodies directed against the adrenergic  $\beta$ -2 receptor were found in 75% of  
796 108 patients with symptoms and in only 17% of 98 age- and sex-matched vaccinated  
797 controls ( $P < 0.001$ ).<sup>108</sup> Antibodies against the muscarinic M-2 receptors were found  
798 in 82% vs 16% ( $P < 0.001$ ) and against either  $\beta$ -2 or M-2 receptors in 92% vs 19% ( $P <$   
799  $0.001$ ). Similar symptoms and neuroendocrine antibodies have been reported in  
800 patients suffering from long-term complications after SARS-CoV-2 infection.<sup>108-110</sup>

801 SARS-CoV-2 infection can cause transverse myelitis, with acute onset of paralysis,  
802 sensory level, and sphincter deficits due to spinal cord lesions demonstrated by  
803 imaging.<sup>111</sup> The occurrence of 2 reported cases among 5,807 participants within two  
804 weeks after vaccination in the pivotal AstraZeneca trial,<sup>4,111</sup> is an extremely high  
805 incidence considering a worldwide incidence of 0.5 cases per million after  
806 infection.<sup>111</sup>

807 SAEs have been systematically eliminated from the pivotal trials.<sup>8</sup> In the Pfizer  
808 and AstraZeneca vaccine trials, participants were given digital apps to record adverse  
809 events remotely, but the apps only allowed the participants to record what the  
810 company deemed as "expected" events. If they developed thrombosis, myocarditis,  
811 Guillain-Barré Syndrome, transverse myelitis, or other serious neurological events,  
812 there was no option for them to record it on the app.

813 Brianne Dressen, a participant in an AstraZeneca trial, became disabled after her  
814 first injection.<sup>8</sup> She is still disabled today, but there is no mention of this in the trial  
815 report in *New England Journal of Medicine*.<sup>36</sup> As Dressen was concerned about the  
816 lack of reporting of her serious adverse event (and others) in the trial's publication,  
817 she wrote to Dr Eric Rubin, editor in chief of the journal, and asked for the  
818 inaccuracies to be corrected and demanded complete reporting of the results. Rubin  
819 refused to correct the inaccurate data in his journal. The full email exchange has  
820 been made public.<sup>8</sup>

821 When Pfizer had recruited 12-15 year olds for its mRNA vaccine trial, the  
822 published data in *New England Journal of Medicine* stated that there were "no  
823 serious vaccine-related adverse events."<sup>46</sup> One of the participants, however, was 13  
824 year old Maddie De Garay who suffered a serious adverse reaction following her first  
825 injection, which left her in a wheelchair and fed by a nasogastric tube.<sup>8</sup> She was  
826 referred to hospital for a full assessment and a doctor diagnosed her with a  
827 "functional disorder." This doctor decided she had a pre-disposition to hysteria, and  
828 she was referred to a mental health facility. Professor and psychiatrist David Healy  
829 subsequently conducted a thorough review of her medical records, including an  
830 interview with her family, and found no such history of pre-existing conditions or  
831 mental illness.

832 Even if data are honestly reported, it is extremely difficult to find rare events in  
833 randomised trials. One would need a trial with 30,000 people in the vaccine arm to  
834 have a 95% chance of detecting a serious harm if it occurs in 1 of 10,000 cases,<sup>112</sup>  
835 and one case is not enough to establish a cause-effect relationship.

836 A rare condition is multisystem inflammatory syndrome in children. A survey of  
837 21 people aged 12–20 years found a reporting rate of one case per million after  
838 vaccination whereas the incidence among unvaccinated people in this age group  
839 who have had a SARS-CoV-2 infection is about 200 cases per million.<sup>113</sup>

840 An important issue, which has received virtually no attention, is that vaccines  
841 have non-specific effects, which are very different for live attenuated vaccines and  
842 for non-live vaccines. Peter Aaby and co-workers have shown in several studies, that  
843 live attenuated vaccines, e.g. against measles, polio and tuberculosis, decrease  
844 mortality from other infections than the targeted one, whereas non-live vaccines  
845 increase mortality.<sup>84,114</sup>

846 Aaby's team has also analysed the randomised trials of the COVID-19 vaccines.  
847 They found that the adenovirus vector vaccines reduced total mortality, risk ratio  
848 0.37 (0.19 to 0.70), in contrast to the mRNA vaccines, risk ratio 1.03 (0.63 to 1.71).<sup>79</sup>  
849 The difference between the two estimates was statistically significant ( $P = 0.03$ ). It is  
850 a missed opportunity that nowhere in the world was the vaccine roll-out done as  
851 part of a randomised trial that could tell us if some vaccines lower mortality more  
852 than others. But now that boosters are being recommended, such trials should be  
853 performed. There is also a need for additional placebo-controlled trials, e.g. in  
854 people who have already been infected.

855 Another missed opportunity is that the drug regulators and other authorities  
856 have been very slow in following up signals of serious harms. In July 2021, based on  
857 medical claims data in older Americans, FDA reported detecting four potential  
858 adverse events of interest: pulmonary embolism, myocardial infarction, immune  
859 thrombocytopenia, and disseminated intravascular coagulation after Pfizer's

860 vaccine.<sup>17</sup> FDA stated it would further investigate the findings, but the agency did  
861 not disclose its data, did not warn the doctors or the public, and 1½ years later, had  
862 still not updated its findings.<sup>115</sup>

863 The US Centers for Disease Control and Prevention were also slow. A study using  
864 VAERS and EudraVigilance comparing the disproportionality of adverse event reports  
865 for the influenza vaccine and the mRNA COVID-19 vaccines reported excess risks for  
866 four Brighton serious adverse events of special interest: cardiovascular events,  
867 coagulation events, haemorrhages, gastrointestinal events, and thromboses.<sup>115,116</sup>  
868 CDC published a protocol in early 2021 for disproportionality analyses in the VAERS  
869 database,<sup>17</sup> but they have not reported the results.

870 Given all the difficulties, obstacles with getting access to regulatory data,  
871 obfuscations, and documented underreporting, we find it likely that there are other  
872 serious harms than those uncovered so far.

873 This area needs further study. Authorities have recommended virtually everyone  
874 get vaccinated and receive booster doses, and fail to consider that the balance  
875 between benefits and harms becomes negative in low-risk groups such as children  
876 and people who have already acquired natural immunity.

877

#### 878 **Author contributions**

879

880 Both authors had full access to all of the data and take responsibility for the integrity  
881 of the data and the accuracy of the data analysis.

882 Study concept and design: Gøtzsche.

883 Protocol: both authors.

884 Acquisition of data: both authors.

885 Analysis and interpretation: both authors.

886 Statistical analysis: Gøtzsche.

887 Drafting of the manuscript: Gøtzsche.

888 Critical revision of the manuscript for important intellectual content: both  
889 authors.

890

#### 891 **Funding**

892

893 Institute for Scientific Freedom and a private funder requesting anonymity, a retired  
894 filmmaker with no conflicts of interests in relation to our review.

895

#### 896 **Conflicts of interest**

897

898 None.

899

#### 900 **Ethical review statement**

901

902 Not relevant.

903

#### 904 **References**

905

- 906 1 FDA Takes Key Action in Fight Against COVID-19 By Issuing Emergency Use  
907 Authorization for First COVID-19 Vaccine. 2020 Dec 11.  
908 [https://www.fda.gov/news-events/press-announcements/fda-takes-key-action-](https://www.fda.gov/news-events/press-announcements/fda-takes-key-action-fight-against-covid-19-issuing-emergency-use-authorization-first-covid-19)  
909 [fight-against-covid-19-issuing-emergency-use-authorization-first-covid-19](https://www.fda.gov/news-events/press-announcements/fda-takes-key-action-fight-against-covid-19-issuing-emergency-use-authorization-first-covid-19)  
910 (accessed 2022 Nov 30).  
911
- 912 2 EMA recommends first COVID-19 vaccine for authorisation in the EU. 2020 Dec  
913 21. [https://www.ema.europa.eu/en/news/ema-recommends-first-covid-19-](https://www.ema.europa.eu/en/news/ema-recommends-first-covid-19-vaccine-authorisation-eu)  
914 [vaccine-authorisation-eu](https://www.ema.europa.eu/en/news/ema-recommends-first-covid-19-vaccine-authorisation-eu) (accessed 2022 Nov 30).  
915
- 916 3 Demasi M. From FDA to MHRA: are drug regulators for hire? *BMJ* 2022 Jun  
917 29;377:o1538. <https://doi.org/10.1136/bmj.o1538>.  
918
- 919 4 Voysey M, Clemens SAC, Madhi SA, Weckx LY, Folegatti PM, Aley PK, et al.  
920 Safety and efficacy of the ChAdOx1 nCoV-19 vaccine (AZD1222) against SARS-  
921 CoV-2: an interim analysis of four randomised controlled trials in Brazil, South  
922 Africa, and the UK. *Lancet* 2021 Jan 9;397:99-111. DOI: [10.1016/S0140-](https://doi.org/10.1016/S0140-6736(20)32661-1)  
923 [6736\(20\)32661-1](https://doi.org/10.1016/S0140-6736(20)32661-1).  
924
- 925 5 Polack FP, Thomas SJ, Kitchin N, Absalon J, Gurtman A, Lockhart S, et al. Safety  
926 and efficacy of the BNT162b2 mRNA Covid-19 Vaccine. *N Engl J Med* 2020 Dec  
927 31;383(27):2603-15. DOI: [10.1056/NEJMoa2034577](https://doi.org/10.1056/NEJMoa2034577).  
928
- 929 6 Baden LR, El Sahly HM, Essink B, Kotloff K, Frey S, Novak S, et al. Efficacy and  
930 safety of the mRNA-1273 SARS-CoV-2 vaccine. *N Engl J Med* 2021;384:403-16.  
931 DOI: [10.1056/NEJMoa2035389](https://doi.org/10.1056/NEJMoa2035389).  
932
- 933 7 Gøtzsche PC. *Deadly medicines and organised crime: How big pharma has*  
934 *corrupted health care*. London: Radcliffe Publishing; 2013.  
935
- 936 8 Demasi M. Are adverse events in Covid-19 vaccine trials under-reported?  
937 Maryanne Demasi's blog. 2021 Nov 24.  
938 [https://maryannedemasi.com/publications/f/are-adverse-events-in-covid-19-](https://maryannedemasi.com/publications/f/are-adverse-events-in-covid-19-vaccine-trials-under-reported)  
939 [vaccine-trials-under-reported](https://maryannedemasi.com/publications/f/are-adverse-events-in-covid-19-vaccine-trials-under-reported) (accessed 2022 Nov 30).  
940
- 941 9 Gøtzsche PC. *The Chinese virus: Killed millions and scientific freedom*.  
942 Copenhagen: Institute for Scientific Freedom; 2022.  
943
- 944 10 Rosenblum HG, Hadler SC, Moulia D, Shimabukuro TT, Su JR, Tepper NK, et al.  
945 Use of COVID-19 Vaccines After Reports of Adverse Events Among Adult  
946 Recipients of Janssen (Johnson & Johnson) and mRNA COVID-19 Vaccines  
947 (Pfizer-BioNTech and Moderna): Update from the Advisory Committee on  
948 Immunization Practices - United States, July 2021. *MMWR Morb Mortal Wkly*  
949 *Rep* 2021;70:1094-9. DOI: [10.15585/mmwr.mm7032e4](https://doi.org/10.15585/mmwr.mm7032e4).  
950
- 951 11 Doshi P, Godlee F, Abbasi K. Covid-19 vaccines and treatments: we must have  
952 raw data, now *BMJ* 2022;376:o102. doi: <https://doi.org/10.1136/bmj.o102>.  
953

- 954 12 Demasi M. FDA to release Pfizer data but the devil could be in the detail. 2022  
955 Jan 8. [https://maryannedemasi.substack.com/p/fda-to-release-pfizer-data-but-](https://maryannedemasi.substack.com/p/fda-to-release-pfizer-data-but-the-devil-could-be-in-the-detail)  
956 [the-devil-could-be-in-the-detail](https://maryannedemasi.substack.com/p/fda-to-release-pfizer-data-but-the-devil-could-be-in-the-detail) (accessed 2022 Nov 30).  
957
- 958 13 Ling Y, Zhong J, Luo J. Safety and effectiveness of SARS-CoV-2 vaccines: A  
959 systematic review and meta-analysis. *J Med Virol* 2021;93:6486-95. DOI:  
960 [10.1002/jmv.27203](https://doi.org/10.1002/jmv.27203).  
961
- 962 14 Xing K, Tu XY, Liu M, Liang ZW, Chen JN, Li JJ, et al. Efficacy and safety of  
963 COVID-19 vaccines: a systematic review. *Zhongguo Dang Dai Er Ke Za Zhi*  
964 2021;23:221-8. <https://pubmed.ncbi.nlm.nih.gov/33691913/>.  
965
- 966 15 Sessa F, Salerno M, Esposito M, Di Nunno N, Zamboni P, Pomara C. Autopsy  
967 Findings and Causality Relationship between Death and COVID-19 Vaccination: A  
968 Systematic Review. *J Clin Med* 2021;10:5876.  
969 <https://www.ncbi.nlm.nih.gov/pmc/articles/PMC8330010/>.  
970
- 971 16 Fan YJ, Chan KH, Hung IF. Safety and Efficacy of COVID-19 Vaccines: A  
972 Systematic Review and Meta-Analysis of Different Vaccines at Phase 3. *Vaccines*  
973 (Basel) 2021;9:989.  
974 <https://www.ncbi.nlm.nih.gov/pmc/articles/PMC8473448/>.  
975
- 976 17 Fraiman J, Erviti J, Jones M, Greenland S, Whelan P, Kaplan RM, et al. Serious  
977 adverse events of special interest following mRNA COVID-19 vaccination in  
978 randomized trials in adults. *Vaccine* 2022;40:5798-5805.  
979 <https://www.ncbi.nlm.nih.gov/pmc/articles/PMC9428332/>.  
980
- 981 18 Kaur RJ, Dutta S, Bhardwaj P, Charan J, Dhingra S, Mitra P, et al. Adverse  
982 Events Reported From COVID-19 Vaccine Trials: A Systematic Review. *Indian J*  
983 *Clin Biochem* 2021;36:427-39.  
984 <https://www.ncbi.nlm.nih.gov/pmc/articles/PMC7997788/>.  
985
- 986 19 Cheng H, Peng Z, Luo W, Si S, Mo M, Zhou H, et al. Efficacy and Safety of  
987 COVID-19 Vaccines in Phase III Trials: A Meta-Analysis. *Vaccines* (Basel)  
988 2021;9:582. doi: 10.3390/vaccines9060582.  
989 <https://www.ncbi.nlm.nih.gov/pmc/articles/PMC8228087/>.  
990
- 991 20 Wu Q, Dudley MZ, Chen X, Bai X, Dong K, Zhuang T, et al. Evaluation of the  
992 safety profile of COVID-19 vaccines: a rapid review. *BMC Med* 2021;19:173. doi:  
993 10.1186/s12916-021-02059-5.  
994 <https://www.ncbi.nlm.nih.gov/pmc/articles/PMC8315897/>.  
995
- 996 21 Yuniar CT, Pratiwi B, Ihsan AF, Laksono BT, Risfayanti I, Fathadina A, et al.  
997 Adverse Events Reporting Quality of Randomized Controlled Trials of COVID-19  
998 Vaccine Using the CONSORT Criteria for Reporting Harms: A Systematic Review.  
999 *Vaccines* (Basel) 2022;10:313. doi: 10.3390/vaccines10020313.  
1000 <https://www.ncbi.nlm.nih.gov/pmc/articles/PMC8875800/>.  
1001

- 1002 22 Pormohammad A, Zarei M, Ghorbani S, Mohammadi M, Razizadeh MH, Turner  
1003 DL, et al. Efficacy and Safety of COVID-19 Vaccines: A Systematic Review and  
1004 Meta-Analysis of Randomized Clinical Trials. *Vaccines (Basel)* 2021 May 6;9:467.  
1005 <https://www.ncbi.nlm.nih.gov/pmc/articles/PMC8148145/>.  
1006
- 1007 23 Kim AY, Woo W, Yon DK, Lee SW, Yang JW, Kim JH, et al. Thrombosis patterns  
1008 and clinical outcome of COVID-19 vaccine-induced immune thrombotic  
1009 thrombocytopenia: A Systematic Review and Meta-Analysis. *Int J Infect Dis*  
1010 2022;119:130-9. doi: 10.1016/j.ijid.2022.03.034.  
1011 <https://www.ncbi.nlm.nih.gov/pmc/articles/PMC8942584/>.  
1012
- 1013 24 Matar RH, Than CA, Nakanishi H, Daniel RS, Smayra K, Sim BL, et al. Outcomes  
1014 of patients with thromboembolic events following coronavirus disease 2019  
1015 AstraZeneca vaccination: a systematic review and meta-analysis. *Blood Coagul*  
1016 *Fibrinolysis* 2022;33:90-112.  
1017 <https://www.ncbi.nlm.nih.gov/pmc/articles/PMC8815637/>.  
1018
- 1019 25 Jaiswal V, Nepal G, Dijamco P, Ishak A, Dagar M, Sarfraz Z, et al. Cerebral  
1020 Venous Sinus Thrombosis Following COVID-19 Vaccination: A Systematic  
1021 Review. *J Prim Care Community Health* 2022;13:21501319221074450.  
1022 <https://www.ncbi.nlm.nih.gov/pmc/articles/PMC8841914/>.  
1023
- 1024 26 Hafeez MU, Ikram M, Shafiq Z, Sarfraz A, Sarfraz Z, Jaiswal V, et al. COVID-19  
1025 Vaccine-Associated Thrombosis With Thrombocytopenia Syndrome (TTS): A  
1026 Systematic Review and Post Hoc Analysis. *Clin Appl Thromb Hemost*  
1027 2021;27:10760296211048815.  
1028 <https://www.ncbi.nlm.nih.gov/pmc/articles/PMC8552386/>.  
1029
- 1030 27 Al-Ali D, Elshafeey A, Mushannen M, Kawas H, Shafiq A, Mhaimed N, et al.  
1031 Cardiovascular and haematological events post COVID-19 vaccination: A  
1032 systematic review. *J Cell Mol Med* 2022;26:636-53. doi: 10.1111/jcmm.17137.  
1033 <https://www.ncbi.nlm.nih.gov/pmc/articles/PMC8817142/>.  
1034
- 1035 28 Goyal M, Ray I, Mascarenhas D, Kunal S, Sachdeva RA, Ish P. Myocarditis post  
1036 SARS-CoV-2 vaccination: a systematic review. *QJM* 2022 Mar 3:hcac064. doi:  
1037 10.1093/qjmed/hcac064. Epub ahead of print.  
1038 <https://www.ncbi.nlm.nih.gov/pmc/articles/PMC8903459/>.  
1039
- 1040 29 Lee ASY, Balakrishnan IDD, Khoo CY, Ng CT, Loh JKK, Chan LL, Teo LLY, Sim  
1041 DKL. Myocarditis Following COVID-19 Vaccination: A Systematic Review  
1042 (October 2020-October 2021). *Heart Lung Circ* 2022;31:757-65. doi:  
1043 10.1016/j.hlc.2022.02.002.  
1044 <https://www.ncbi.nlm.nih.gov/pmc/articles/PMC8874750/>.  
1045
- 1046 30 Bellos I, Karageorgiou V, Viskin D. Myocarditis following mRNA Covid-19  
1047 vaccination: A pooled analysis. *Vaccine* 2022;40:1768-74. doi:  
1048 10.1016/j.vaccine.2022.02.017. <https://pubmed.ncbi.nlm.nih.gov/35153093/>.  
1049

- 1050 31 Matta A, Kunadharaju R, Osman M, Jesme C, McMiller Z, Johnson EM, et al.  
1051 Clinical Presentation and Outcomes of Myocarditis Post mRNA Vaccination: A  
1052 Meta-Analysis and Systematic Review. *Cureus* 2021;13:e19240. doi:  
1053 10.7759/cureus.19240.  
1054 <https://www.ncbi.nlm.nih.gov/pmc/articles/PMC8641964/>.  
1055
- 1056 32 Lv M, Luo X, Shen Q, Lei R, Liu X, Liu E, et al. Safety, Immunogenicity, and  
1057 Efficacy of COVID-19 Vaccines in Children and Adolescents: A Systematic Review.  
1058 *Vaccines (Basel)* 2021;9:1102. [https://www.mdpi.com/2076-](https://www.mdpi.com/2076-393X/9/10/1102/htm)  
1059 [393X/9/10/1102/htm](https://www.mdpi.com/2076-393X/9/10/1102/htm).  
1060
- 1061 33 Ismail II, Salama S. A systematic review of cases of CNS demyelination  
1062 following COVID-19 vaccination. *J Neuroimmunol* 2022;362:577765. doi:  
1063 10.1016/j.jneuroim.2021.577765.  
1064 <https://www.ncbi.nlm.nih.gov/pmc/articles/PMC8577051/>.  
1065
- 1066 34 Thomas SJ, Moreira ED Jr, Kitchin N, Absalon J, Gurtman A, Lockhart S, et al.  
1067 Safety and Efficacy of the BNT162b2 mRNA Covid-19 Vaccine through 6 Months.  
1068 *N Engl J Med* 2021;385:1761-73. doi: 10.1056/NEJMoa2110345.  
1069 <https://www.ncbi.nlm.nih.gov/pmc/articles/PMC8461570/>.  
1070
- 1071 35 Sadoff J, Gray G, Vandebosch A, Cárdenas V, Shukarev G, Grinsztejn B, et al.  
1072 Final Analysis of Efficacy and Safety of Single-Dose Ad26.COV2.S. *N Engl J Med*  
1073 2022;386:847-60. doi: 10.1056/NEJMoa2117608.  
1074 <https://www.ncbi.nlm.nih.gov/pmc/articles/PMC8849184/>.  
1075
- 1076 36 Falsey AR, Sobieszczyk ME, Hirsch I, Sproule S, Robb ML, Corey L, et al. Phase  
1077 3 Safety and Efficacy of AZD1222 (ChAdOx1 nCoV-19) Covid-19 Vaccine. *N Engl J*  
1078 *Med* 2021;385:2348-60. doi: 10.1056/NEJMoa2105290.  
1079 <https://www.ncbi.nlm.nih.gov/pmc/articles/PMC8522798/>.  
1080
- 1081 37 Khobragade A, Bhate S, Ramaiah V, Deshpande S, Giri K, Phophle H, et al.  
1082 Efficacy, safety, and immunogenicity of the DNA SARS-CoV-2 vaccine (ZyCoV-D):  
1083 the interim efficacy results of a phase 3, randomised, double-blind, placebo-  
1084 controlled study in India. *Lancet* 2022;399:1313-21. doi: 10.1016/S0140-  
1085 6736(22)00151-9. <https://www.ncbi.nlm.nih.gov/pmc/articles/PMC8970574/>.  
1086
- 1087 38 Heath PT, Galiza EP, Baxter DN, Boffito M, Browne D, Burns F, et al. Safety and  
1088 Efficacy of NVX-CoV2373 Covid-19 Vaccine. *N Engl J Med* 2021;385:1172-83. doi:  
1089 10.1056/NEJMoa2107659.  
1090 <https://www.ncbi.nlm.nih.gov/pmc/articles/PMC8262625/>.  
1091
- 1092 39 Dunkle LM, Kotloff KL, Gay CL, Áñez G, Adelglass JM, Barrat Hernández AQ, et  
1093 al. Efficacy and Safety of NVX-CoV2373 in Adults in the United States and Mexico.  
1094 *N Engl J Med*. 2022;386:531-43. doi: 10.1056/NEJMoa2116185.  
1095 <https://www.ncbi.nlm.nih.gov/pmc/articles/PMC8693692/>.  
1096
- 1097 40 Fadlyana E, Rusmil K, Tarigan R, Rahmadi AR, Prodjosowoyo S, Sofiatin Y, et  
1098 al. A phase III, observer-blind, randomized, placebo-controlled study of the



- 1099 efficacy, safety, and immunogenicity of SARS-CoV-2 inactivated vaccine in  
1100 healthy adults aged 18-59 years: An interim analysis in Indonesia. *Vaccine*  
1101 2021;39:6520-28. doi: 10.1016/j.vaccine.2021.09.052.  
1102 <https://www.ncbi.nlm.nih.gov/pmc/articles/PMC8461222/>.  
1103
- 1104 41 Hsieh SM, Liu MC, Chen YH, Lee WS, Hwang SJ, Cheng SH, et al. Safety and  
1105 immunogenicity of CpG 1018 and aluminium hydroxide-adjuvanted SARS-CoV-2  
1106 S-2P protein vaccine MVC-COV1901: interim results of a large-scale, double-  
1107 blind, randomised, placebo-controlled phase 2 trial in Taiwan. *Lancet Respir Med*  
1108 2021;9:1396-1406. doi: 10.1016/S2213-2600(21)00402-1.  
1109 <https://www.ncbi.nlm.nih.gov/pmc/articles/PMC8514195/>.  
1110
- 1111 42 Kulkarni PS, Padmapriyadarsini C, Vekemans J, Bavdekar A, Gupta M, Kulkarni  
1112 P, et al. A phase 2/3, participant-blind, observer-blind, randomised, controlled  
1113 study to assess the safety and immunogenicity of SII-ChAdOx1 nCoV-19 (COVID-  
1114 19 vaccine) in adults in India. *EClinicalMedicine* 2021;42:101218. doi:  
1115 10.1016/j.eclinm.2021.101218.  
1116 <https://www.ncbi.nlm.nih.gov/pmc/articles/PMC8629682/>.  
1117
- 1118 43 Moreira ED Jr, Kitchin N, Xu X, Dychter SS, Lockhart S, Gurtman A, et al. Safety  
1119 and Efficacy of a Third Dose of BNT162b2 Covid-19 Vaccine. *N Engl J Med*  
1120 2022;386:1910-21. doi: 10.1056/NEJMoa2200674.  
1121 <https://www.ncbi.nlm.nih.gov/pmc/articles/PMC9006787/>.  
1122
- 1123 44 Munro APS, Janani L, Cornelius V, Aley PK, Babbage G, Baxter D, et al. Safety  
1124 and immunogenicity of seven COVID-19 vaccines as a third dose (booster)  
1125 following two doses of ChAdOx1 nCov-19 or BNT162b2 in the UK (COV-BOOST):  
1126 a blinded, multicentre, randomised, controlled, phase 2 trial. *Lancet*  
1127 2021;398:2258-76. doi: 10.1016/S0140-6736(21)02717-3.  
1128 <https://www.ncbi.nlm.nih.gov/pmc/articles/PMC8639161/>.  
1129
- 1130 45 Ali K, Berman G, Zhou H, Deng W, Faughnan V, Coronado-Voges M, et al.  
1131 Evaluation of mRNA-1273 SARS-CoV-2 Vaccine in Adolescents. *N Engl J Med*  
1132 2021;385:2241-51. doi: 10.1056/NEJMoa2109522.  
1133 <https://www.ncbi.nlm.nih.gov/pmc/articles/PMC8385554/>.  
1134
- 1135 46 Frenck RW Jr, Klein NP, Kitchin N, Gurtman A, Absalon J, Lockhart S, et al.  
1136 Safety, Immunogenicity, and Efficacy of the BNT162b2 Covid-19 Vaccine in  
1137 Adolescents. *N Engl J Med* 2021;385:239-50. doi: 10.1056/NEJMoa2107456.  
1138 <https://www.ncbi.nlm.nih.gov/pmc/articles/PMC8174030/>.  
1139
- 1140 47 Xia S, Zhang Y, Wang Y, Wang H, Yang Y, Gao GF, et al. Safety and  
1141 immunogenicity of an inactivated COVID-19 vaccine, BBIBP-CorV, in people  
1142 younger than 18 years: a randomised, double-blind, controlled, phase 1/2 trial.  
1143 *Lancet Infect Dis* 2022;22:196-208. doi: 10.1016/S1473-3099(21)00462-X.  
1144 <https://www.ncbi.nlm.nih.gov/pmc/articles/PMC8443232/>.  
1145
- 1146 48 Bardenheier BH, Gravenstein S, Blackman C, Gutman R, Sarkar IN, Feifer RA,  
1147 et al. Adverse events following mRNA SARS-CoV-2 vaccination among U.S.

- 1148 nursing home residents. *Vaccine* 2021;39:3844-51. DOI:  
1149 [10.1016/j.vaccine.2021.05.088](https://doi.org/10.1016/j.vaccine.2021.05.088).  
1150
- 1151 49 Hippisley-Cox J, Patone M, Mei XW, Saatci D, Dixon S, Khunti K, et al. Risk of  
1152 thrombocytopenia and thromboembolism after covid-19 vaccination and SARS-  
1153 CoV-2 positive testing: self-controlled case series study. *BMJ* 2021;374:n1931.  
1154 doi: 10.1136/bmj.n1931.  
1155 <https://www.ncbi.nlm.nih.gov/pmc/articles/PMC8388189/>.  
1156
- 1157 50 Simpson CR, Shi T, Vasileiou E, Katikireddi SV, Kerr S, Moore E, et al. First-  
1158 dose ChAdOx1 and BNT162b2 COVID-19 vaccines and thrombocytopenic,  
1159 thromboembolic and hemorrhagic events in Scotland. *Nat Med* 2021;27:1290-7.  
1160 doi: 10.1038/s41591-021-01408-4.  
1161 <https://www.ncbi.nlm.nih.gov/pmc/articles/PMC8282499/>.  
1162
- 1163 51 Jeet Kaur RJ, Dutta S, Charan J, Bhardwaj P, Tandon A, Yadav D, et al.  
1164 Cardiovascular Adverse Events Reported from COVID-19 Vaccines: A Study  
1165 Based on WHO Database. *Int J Gen Med* 2021;14:3909-27. doi:  
1166 10.2147/IJGM.S324349.  
1167 <https://www.ncbi.nlm.nih.gov/pmc/articles/PMC8326931/>.  
1168
- 1169 52 Whiteley WN, Ip S, Cooper JA, Bolton T, Keene S, Walker V, et al. Association of  
1170 COVID-19 vaccines ChAdOx1 and BNT162b2 with major venous, arterial, or  
1171 thrombocytopenic events: A population-based cohort study of 46 million adults  
1172 in England. *PLoS Med* 2022;19:e1003926.  
1173 <https://doi.org/10.1371/journal.pmed.1003926>.  
1174
- 1175 53 Li X, Burn E, Duarte-Salles T, Yin C, Reich C, Delmestri A, et al. Comparative  
1176 risk of thrombosis with thrombocytopenia syndrome or thromboembolic events  
1177 associated with different covid-19 vaccines: international network cohort study  
1178 from five European countries and the US. *BMJ* 2022;379:e071594. doi:  
1179 10.1136/bmj-2022-071594.  
1180 <https://www.ncbi.nlm.nih.gov/pmc/articles/PMC9597610/>.  
1181
- 1182 54 Hviid A, Hansen JV, Thiesson EM, Wohlfahrt J. Association of AZD1222 and  
1183 BNT162b2 COVID-19 vaccination with thromboembolic and thrombocytopenic  
1184 events in frontline personnel: a retrospective cohort study. *Ann Intern Med*  
1185 2022;175:541-6. <https://www.ncbi.nlm.nih.gov/pmc/articles/PMC8805866/>.  
1186
- 1187 55 Cari L, Alhosseini MN, Fiore P, Pierno S, Pacor S, Bergamo A, et al.  
1188 Cardiovascular, neurological, and pulmonary events following vaccination with  
1189 the BNT162b2, ChAdOx1 nCoV-19, and Ad26.COV2.S vaccines: An analysis of  
1190 European data. *J Autoimmun* 2021;125:102742. doi:  
1191 10.1016/j.jaut.2021.102742.  
1192 [https://www.sciencedirect.com/science/article/pii/S0896841121001505?via%](https://www.sciencedirect.com/science/article/pii/S0896841121001505?via%3Dihub)  
1193 [3Dihub](https://www.sciencedirect.com/science/article/pii/S0896841121001505?via%3Dihub).  
1194
- 1195 56 Cari L, Fiore P, Naghavi Alhosseini M, Sava G, Nocentini G. Blood clots and  
1196 bleeding events following BNT162b2 and ChAdOx1 nCoV-19 vaccine: An analysis

- 1197 of European data. *J Autoimmun* 2021;122:102685. doi:  
1198 10.1016/j.jaut.2021.102685.  
1199 <https://www.ncbi.nlm.nih.gov/pmc/articles/PMC8220408/>.  
1200
- 1201 57 Jabagi MJ, Botton J, Bertrand M, Weill A, Farrington P, Zureik M, et al.  
1202 Myocardial Infarction, Stroke, and Pulmonary Embolism After BNT162b2 mRNA  
1203 COVID-19 Vaccine in People Aged 75 Years or Older. *JAMA* 2022;327:80-2. doi:  
1204 10.1001/jama.2021.21699.  
1205 <https://www.ncbi.nlm.nih.gov/pmc/articles/PMC8609457/>.  
1206
- 1207 58 Pawlowski C, Rincón-Hekking J, Awasthi S, Pandey V, Lenehan P,  
1208 Venkatakrisnan AJ, et al. Cerebral Venous Sinus Thrombosis is not Significantly  
1209 Linked to COVID-19 Vaccines or Non-COVID Vaccines in a Large Multi-State  
1210 Health System. *J Stroke Cerebrovasc Dis* 2021;30:105923. doi:  
1211 10.1016/j.jstrokecerebrovasdis.2021.105923.  
1212 <https://www.ncbi.nlm.nih.gov/pmc/articles/PMC8494567/>.  
1213
- 1214 59 Abbattista M, Martinelli I, Peyvandi F. Comparison of adverse drug reactions  
1215 among four COVID-19 vaccines in Europe using the EudraVigilance database:  
1216 Thrombosis at unusual sites. *J Thromb Haemost* 2021;19:2554-8. doi:  
1217 10.1111/jth.15493. <https://www.ncbi.nlm.nih.gov/pmc/articles/PMC8420446/>.  
1218
- 1219 60 Showkathali R, Yalamanchi R, Narra L, Vinayagamoorthy N, Gunasekaran S,  
1220 Nayak R, et al. Coronary thrombo-embolic events after Covid-19 vaccination- a  
1221 single centre study. *Indian Heart J* 2022;74:131-4. doi:  
1222 10.1016/j.ihj.2022.01.002.  
1223 <https://www.ncbi.nlm.nih.gov/pmc/articles/PMC8808476/>.  
1224
- 1225 61 Patone M, Mei XW, Handunnetthi L, Dixon S, Zaccardi F, Shankar-Hari M, et al.  
1226 Risk of Myocarditis After Sequential Doses of COVID-19 Vaccine and SARS-CoV-2  
1227 Infection by Age and Sex. *Circulation* 2022;146:743-54. doi:  
1228 10.1161/CIRCULATIONAHA.122.059970.  
1229 <https://www.ncbi.nlm.nih.gov/pmc/articles/PMC9439633/>.  
1230
- 1231 62 Patone M, Mei XW, Handunnetthi L, Dixon S, Zaccardi F, Shankar-Hari M, et al.  
1232 Risks of myocarditis, pericarditis, and cardiac arrhythmias associated with  
1233 COVID-19 vaccination or SARS-CoV-2 infection. *Nat Med* 2022;28:410-22. doi:  
1234 10.1038/s41591-021-01630-0.  
1235 <https://www.ncbi.nlm.nih.gov/pmc/articles/PMC8863574/>.  
1236
- 1237 63 Chouchana L, Blet A, Al-Khalaf M, Kafil TS, Nair G, Robblee J, et al. Features of  
1238 Inflammatory Heart Reactions Following mRNA COVID-19 Vaccination at a  
1239 Global Level. *Clin Pharmacol Ther* 2022;111:605-13. doi: 10.1002/cpt.2499.  
1240 <https://www.ncbi.nlm.nih.gov/pmc/articles/PMC9015432/>.  
1241
- 1242 64 Oster ME, Shay DK, Su JR, Gee J, Creech CB, Broder KR, et al. Myocarditis Cases  
1243 Reported After mRNA-Based COVID-19 Vaccination in the US From December  
1244 2020 to August 2021. *JAMA* 2022;327:331-40. doi: 10.1001/jama.2021.24110.  
1245 <https://www.ncbi.nlm.nih.gov/pmc/articles/PMC8790664/>.

- 1246  
1247 65 Li M, Yuan J, Lv G, Brown J, Jiang X, Lu ZK. Myocarditis and Pericarditis  
1248 following COVID-19 Vaccination: Inequalities in Age and Vaccine Types. *J Pers*  
1249 *Med* 2021;11:1106. <https://www.ncbi.nlm.nih.gov/pmc/articles/PMC8624452/>.  
1250  
1251 66 Patone M, Handunnetthi L, Saatci D, Pan J, Katikireddi SV, Razvi S, et al.  
1252 Neurological complications after first dose of COVID-19 vaccines and SARS-CoV-  
1253 2 infection. *Nat Med* 2021;27:2144-2153. doi: 10.1038/s41591-021-01556-7.  
1254 <https://www.nature.com/articles/s41591-021-01556-7>.  
1255  
1256 67 Li X, Raventós B, Roel E, Pistillo A, Martinez-Hernandez E, Delmestri A, et al.  
1257 Association between covid-19 vaccination, SARS-CoV-2 infection, and risk of  
1258 immune mediated neurological events: population based cohort and self-  
1259 controlled case series analysis. *BMJ* 2022;376:e068373. doi: 10.1136/bmj-2021-  
1260 068373.  
1261 <https://www.ncbi.nlm.nih.gov/pmc/articles/PMC8924704/>.  
1262  
1263 68 Shemer A, Pras E, Einan-Lifshitz A, Dubinsky-Pertzov B, Hecht I. Association  
1264 of COVID-19 Vaccination and Facial Nerve Palsy: A Case-Control Study. *JAMA*  
1265 *Otolaryngol Head Neck Surg* 2021;147:739-43. doi: 10.1001/jamaoto.2021.1259.  
1266 <https://www.ncbi.nlm.nih.gov/pmc/articles/PMC8227442/>.  
1267  
1268 69 Shibli R, Barnett O, Abu-Full Z, Gronich N, Najjar-Debbiny R, Doweck I, et al.  
1269 Association between vaccination with the BNT162b2 mRNA COVID-19 vaccine  
1270 and Bell's palsy: a population-based study. *Lancet Reg Health Eur*  
1271 2021;11:100236. doi: 10.1016/j.lanepe.2021.100236.  
1272 <https://www.ncbi.nlm.nih.gov/pmc/articles/PMC8566165/>.  
1273  
1274 70 Shasha D, Bareket R, Sikron FH, Gertel O, Tsamir J, Dvir D, et al. Real-world  
1275 safety data for the Pfizer BNT162b2 SARS-CoV-2 vaccine: historical cohort study.  
1276 *Clin Microbiol Infect* 2022;28:130-4. doi: 10.1016/j.cmi.2021.09.018.  
1277 <https://pubmed.ncbi.nlm.nih.gov/34592420/>.  
1278  
1279 71 Nosedà R, Ripellino P, Ghidossi S, Bertoli R, Ceschi A. Reporting of Acute  
1280 Inflammatory Neuropathies with COVID-19 Vaccines: Subgroup  
1281 Disproportionality Analyses in VigiBase. *Vaccines (Basel)* 2021;9:1022. doi:  
1282 10.3390/vaccines9091022.  
1283 <https://www.ncbi.nlm.nih.gov/pmc/articles/PMC8473382/>.  
1284  
1285 72 Dutta S, Kaur R, Charan J, Bhardwaj P, Ambwani SR, Babu S, et al. Analysis of  
1286 Neurological Adverse Events Reported in VigiBase From COVID-19 Vaccines.  
1287 *Cureus* 2022;14:e21376. doi: 10.7759/cureus.21376.  
1288 <https://www.ncbi.nlm.nih.gov/pmc/articles/PMC8852793/>.  
1289  
1290 73 Formeister EJ, Wu MJ, Chari DA, Meek R 3rd, Rauch SD, Remenschneider AK,  
1291 et al. Assessment of Sudden Sensorineural Hearing Loss After COVID-19  
1292 Vaccination. *JAMA Otolaryngol Head Neck Surg* 2022;148:307-15. doi:  
1293 10.1001/jamaoto.2021.4414.  
1294 <https://jamanetwork.com/journals/jamaotolaryngology/fullarticle/2789496>.

- 1295  
1296 74 Efrati S, Catalogna M, Abu Hamad R, Hadanny A, Bar-Chaim A, Benveniste-  
1297 Levkovitz P, et al. Safety and humoral responses to BNT162b2 mRNA vaccination  
1298 of SARS-CoV-2 previously infected and naive populations. *Sci Rep*  
1299 2021;11:16543. doi: 10.1038/s41598-021-96129-6.  
1300 <https://www.ncbi.nlm.nih.gov/pmc/articles/PMC8367980/>.  
1301  
1302 75 Chalkias S, Schwartz H, Nestorova B, Feng J, Chang Y, Zhou H, et al. Safety and  
1303 Immunogenicity of a 100 µg mRNA-1273 Vaccine Booster for Severe Acute  
1304 Respiratory Syndrome Coronavirus-2 (SARS-CoV-2). *medRxiv [Preprint]* 2022  
1305 Mar 7:2022.03.04.22271830. doi: 10.1101/2022.03.04.22271830.  
1306 <https://www.ncbi.nlm.nih.gov/pmc/articles/PMC8923111/>.  
1307  
1308 76 Hause AM, Baggs J, Gee J, Marquez P, Myers TR, Shimabukuro TT, et al. Safety  
1309 Monitoring of an Additional Dose of COVID-19 Vaccine - United States, August  
1310 12-September 19, 2021. *MMWR Morb Mortal Wkly Rep* 2021;70:1379-84. doi:  
1311 10.15585/mmwr.mm7039e4.  
1312 <https://www.ncbi.nlm.nih.gov/pmc/articles/PMC8486391/>.  
1313  
1314 77 Mitchell J, Yue QY. Appendicitis as a possible safety signal for the COVID-19  
1315 vaccines. *Vaccine X* 2021;9:100122. doi: 10.1016/j.jvax.2021.100122.  
1316 <https://www.ncbi.nlm.nih.gov/pmc/articles/PMC8565092/>.  
1317  
1318 78 Kildegaard H, Ladebo L, Andersen JH, Jensen PB, Rasmussen L, Damkier P, et  
1319 al. Risk of Appendicitis After mRNA COVID-19 Vaccination in a Danish  
1320 Population. *JAMA Intern Med* 2022;182:684-6. doi:  
1321 10.1001/jamainternmed.2022.1222.  
1322 <https://jamanetwork.com/journals/jamainternalmedicine/fullarticle/2791667>.  
1323  
1324 79 Benn CS, Nielsen S, Schaltz-Buchholzer F, Netea MG, Aaby P. Randomised  
1325 clinical trials of COVID-19 vaccines: do adenovirus-vector vaccines have  
1326 beneficial non-specific effects? *Lancet preprint* 2022; 5 April.  
1327 [https://papers.ssrn.com/sol3/papers.cfm?abstract\\_id=4072489](https://papers.ssrn.com/sol3/papers.cfm?abstract_id=4072489).  
1328  
1329 80 COVID-19 Vaccine AstraZeneca: benefits still outweigh the risks despite  
1330 possible link to rare blood clots with low blood platelets. EMA 2021 March 18.  
1331 [https://www.ema.europa.eu/en/news/covid-19-vaccine-astrazeneca-benefits-](https://www.ema.europa.eu/en/news/covid-19-vaccine-astrazeneca-benefits-still-outweigh-risks-despite-possible-link-rare-blood-clots)  
1332 [still-outweigh-risks-despite-possible-link-rare-blood-clots](https://www.ema.europa.eu/en/news/covid-19-vaccine-astrazeneca-benefits-still-outweigh-risks-despite-possible-link-rare-blood-clots) (accessed 2022 Nov  
1333 30).  
1334  
1335 81 Jørgensen FR, Gøtzsche PC, Hein P, Jensen CM, Nielsen BM, Nielsen FM, et al.  
1336 Naproxen (Naprosyn) og mobilisering ved behandling af akut ankeldistorsion  
1337 [Naproxen (Naprosyn) and mobilization in the treatment of acute ankle sprains].  
1338 *Ugeskr Laeger* 1986;148:1266-8. <https://pubmed.ncbi.nlm.nih.gov/3523914/>.  
1339  
1340 82 Gøtzsche PC. Big marketing hoax: Non-steroidal, anti-inflammatory drugs  
1341 (NSAIDs) are not anti-inflammatory. Copenhagen: Institute for Scientific  
1342 Freedom 2022 Nov 10. <https://www.scientificfreedom.dk/2022/11/10/big->

- 1343 [marketing-hoax-non-steroidal-anti-inflammatory-drugs-nsaids-are-not-anti-](#)  
1344 [inflammatory/](#) (accessed 2022 Nov 30).  
1345  
1346 83 Gøtzsche PC. Sensitivity of effect variables in rheumatoid arthritis: a meta-  
1347 analysis of 130 placebo controlled NSAID trials. J Clin Epidemiol 1990;43:1313-  
1348 8. DOI: [10.1016/0895-4356\(90\)90097-9](https://doi.org/10.1016/0895-4356(90)90097-9).  
1349  
1350 84 Gøtzsche PC. Vaccines: truth, lies, and controversy. New York: Skyhorse;  
1351 2021.  
1352  
1353 85 Doshi P. Covid-19 vaccines: In the rush for regulatory approval, do we need  
1354 more data? BMJ 2021;373:n1244 doi:10.1136/bmj.n1244.  
1355 <https://www.bmj.com/content/373/bmj.n1244>.  
1356  
1357 86 FDA Authorizes Booster Dose of Pfizer-BioNTech COVID-19 Vaccine for  
1358 Certain Populations. 2021 Sept 22. [https://www.fda.gov/news-events/press-](https://www.fda.gov/news-events/press-announcements/fda-authorizes-booster-dose-pfizer-biontech-covid-19-vaccine-certain-populations)  
1359 [announcements/fda-authorizes-booster-dose-pfizer-biontech-covid-19-vaccine-](https://www.fda.gov/news-events/press-announcements/fda-authorizes-booster-dose-pfizer-biontech-covid-19-vaccine-certain-populations)  
1360 [certain-populations](https://www.fda.gov/news-events/press-announcements/fda-authorizes-booster-dose-pfizer-biontech-covid-19-vaccine-certain-populations) (accessed 2022 Nov 30).  
1361  
1362 87 Comirnaty and Spikevax: EMA recommendations on extra doses and boosters.  
1363 2021 Oct 4. [https://www.ema.europa.eu/en/news/comirnaty-spikevax-ema-](https://www.ema.europa.eu/en/news/comirnaty-spikevax-ema-recommendations-extra-doses-boosters)  
1364 [recommendations-extra-doses-boosters](https://www.ema.europa.eu/en/news/comirnaty-spikevax-ema-recommendations-extra-doses-boosters) (accessed 2022 Nov 30).  
1365  
1366 88 Ferdinands JM, Rao S, Dixon BE, Mitchell PK, DeSilva MB, Irving SA, et al.  
1367 Waning 2-Dose and 3-Dose Effectiveness of mRNA Vaccines Against COVID-19-  
1368 Associated Emergency Department and Urgent Care Encounters and  
1369 Hospitalizations Among Adults During Periods of Delta and Omicron Variant  
1370 Predominance — VISION Network, 10 States, August 2021–January 2022.  
1371 MMWR 2022;71:255-63. doi: <http://dx.doi.org/10.15585/mmwr.mm7107e2>.  
1372  
1373 89 Burger L, Aripaka P. EU drugs regulator says data supports vaccine boosters  
1374 after three months. Reuters. 2021 Dec 9.  
1375 [https://www.reuters.com/world/europe/eu-drugs-regulator-says-data-](https://www.reuters.com/world/europe/eu-drugs-regulator-says-data-supports-vaccine-boosters-after-three-months-2021-12-09/)  
1376 [supports-vaccine-boosters-after-three-months-2021-12-09/](https://www.reuters.com/world/europe/eu-drugs-regulator-says-data-supports-vaccine-boosters-after-three-months-2021-12-09/) (accessed 2022 Nov  
1377 30).  
1378  
1379 90 Reuters. EU drug regulator expresses doubt on need for fourth booster dose.  
1380 2022 Jan 11. [https://www.reuters.com/business/healthcare-](https://www.reuters.com/business/healthcare-pharmaceuticals/eu-drug-regulator-says-more-data-needed-impact-omicron-vaccines-2022-01-11/)  
1381 [pharmaceuticals/eu-drug-regulator-says-more-data-needed-impact-omicron-](https://www.reuters.com/business/healthcare-pharmaceuticals/eu-drug-regulator-says-more-data-needed-impact-omicron-vaccines-2022-01-11/)  
1382 [vaccines-2022-01-11/](https://www.reuters.com/business/healthcare-pharmaceuticals/eu-drug-regulator-says-more-data-needed-impact-omicron-vaccines-2022-01-11/) (accessed 2022 Nov 30).  
1383  
1384 91 Skowronski DM, De Serres G, Crowcroft NS, Janjua NZ, Boulianne N, Hottes TS,  
1385 et al. Association between the 2008-09 seasonal influenza vaccine and pandemic  
1386 H1N1 illness during Spring-Summer 2009: four observational studies from  
1387 Canada. PLoS Med 2010;7:e1000258. DOI: [10.1371/journal.pmed.1000258](https://doi.org/10.1371/journal.pmed.1000258).  
1388  
1389 92 Deeks JJ, Dinnes J, D'Amico R, Sowden AJ, Sakarovitch C, Song F, et al.  
1390 Evaluating non-randomised intervention studies. Health Technol Assess  
1391 2003;7:iii-x, 1-173. DOI: [10.3310/hta7270](https://doi.org/10.3310/hta7270).

- 1392  
1393 93 Li X, Ostroplets A, Makadia R, Shoaibi A, Rao G, Sena AG, et al. Characterising  
1394 the background incidence rates of adverse events of special interest for covid-19  
1395 vaccines in eight countries: multinational network cohort study. *BMJ*  
1396 2021;373:n1435. DOI: [10.1136/bmj.n1435](https://doi.org/10.1136/bmj.n1435).  
1397  
1398 94 Wadman M. Scientists quit journal board, protesting 'grossly irresponsible'  
1399 study claiming COVID-19 vaccines kill. *Science* 2021 July 1.  
1400 <https://www.science.org/content/article/scientists-quit-journal-board->  
1401 [protesting-grossly-irresponsible-study-claiming-covid-19](https://www.science.org/content/article/scientists-quit-journal-board-) (accessed 2022 Nov  
1402 30).  
1403  
1404 95 Walach H, Klement RJ, Aukema W. Retracted: The Safety of COVID-19  
1405 Vaccinations - We Should Rethink the Policy. *Vaccines (Basel)* 2021 Jun  
1406 24;9(7):693. doi: 10.3390/vaccines9070693. Retraction in: *Vaccines (Basel)*  
1407 2021 Jul 02;9(7):null.  
1408 <https://www.ncbi.nlm.nih.gov/pmc/articles/PMC8294615/>.  
1409  
1410 96 Sultana A, Shahriar S, Tahsin MR, Mim SR, Fatema KR, Saha A, et al. A  
1411 Retrospective Cross-Sectional Study Assessing Self-Reported Adverse Events  
1412 following Immunization (AEFI) of the COVID-19 Vaccine in Bangladesh. *Vaccines*  
1413 (Basel) 2021;9:1090. doi: 10.3390/vaccines9101090.  
1414 <https://www.ncbi.nlm.nih.gov/pmc/articles/PMC8538494/>.  
1415  
1416 97 Liberati A, Altman DG, Tetzlaff J, Mulrow C, Gøtzsche PC, Ioannidis JPA, et al.  
1417 The PRISMA statement for reporting systematic reviews and meta-analyses of  
1418 studies that evaluate healthcare interventions: explanation and elaboration. *BMJ*  
1419 2009;339:b2700. DOI: [10.1136/bmj.b2700](https://doi.org/10.1136/bmj.b2700).  
1420  
1421 98 Sun CLF, Jaffe E, Levi R. Increased emergency cardiovascular events among  
1422 under-40 population in Israel during vaccine rollout and third COVID-19 wave.  
1423 *Sci Rep* 2022;12:6978. <https://doi.org/10.1038/s41598-022-10928-z>.  
1424  
1425 99 Reuters Fact Check. Fact Check-Study using Israeli emergency services data  
1426 does not prove COVID-19 vaccines cause heart problems. 2022 May 10.  
1427 <https://www.reuters.com/article/factcheck-study-emergency-idUSL2N2X21LM>  
1428 (accessed 2022 Dec 2).  
1429  
1430 100 Morgan J, Roper MH, Sperling L, Schieber RA, Heffelfinger JD, Casey CG, et al.  
1431 Myocarditis, pericarditis, and dilated cardiomyopathy after smallpox vaccination  
1432 among civilians in the United States, January-October 2003. *Clin Infect Dis*  
1433 2008;46 Suppl 3:S242-50. doi: 10.1086/524747.  
1434 [https://academic.oup.com/cid/article/46/Supplement\\_3/S242/575828?login=f](https://academic.oup.com/cid/article/46/Supplement_3/S242/575828?login=false)  
1435 [alse](https://academic.oup.com/cid/article/46/Supplement_3/S242/575828?login=false).  
1436  
1437 101 Langmuir AD. Guillain-Barré syndrome: the swine influenza virus vaccine  
1438 incident in the United States of America, 1976-77: preliminary communication. *J*  
1439 *R Soc Med* 1979;72:660-9. doi: 10.1177/014107687907200908.  
1440 <https://www.ncbi.nlm.nih.gov/pmc/articles/PMC1436986/>.

- 1441  
1442 102 Nohynek H, Jokinen J, Partinen M, Vaarala O, Kirjavainen T, Sundmanet J, et  
1443 al. AS03 adjuvanted AH1N1 vaccine associated with an abrupt increase in the  
1444 incidence of childhood narcolepsy in Finland. PLoS One 2012;7:e33536.  
1445 <https://www.ncbi.nlm.nih.gov/pmc/articles/PMC3314666/>.  
1446  
1447 103 Vogel G. Why a pandemic flu shot caused narcolepsy. Science 2015 July 1.  
1448 [https://www.science.org/content/article/why-pandemic-flu-shot-caused-](https://www.science.org/content/article/why-pandemic-flu-shot-caused-narcolepsy)  
1449 [narcolepsy](https://www.science.org/content/article/why-pandemic-flu-shot-caused-narcolepsy) (accessed 2022 Dec 2).  
1450  
1451 104 Jørgensen L, Gøtzsche PC, Jefferson T. Benefits and harms of the human  
1452 papillomavirus (HPV) vaccines: systematic review with meta-analyses of trial  
1453 data from clinical study reports. Syst Rev 2020;9:43. DOI: [10.1186/s13643-019-](https://doi.org/10.1186/s13643-019-0983-y)  
1454 [0983-y](https://doi.org/10.1186/s13643-019-0983-y).  
1455  
1456 105 Gøtzsche PC, Jørgensen KJ. EMA's mishandling of an investigation into  
1457 suspected serious neurological harms of HPV vaccines. BMJ Evid Based Med  
1458 2022;27:7-10. <http://dx.doi.org/10.1136/bmjebm-2020-111470>.  
1459  
1460 106 React 19. Covid Vaccine Persistent Symptoms Survey. 2022 Oct 5.  
1461 [https://www.react19.org/post/persistent-neurological-symptoms-patient-](https://www.react19.org/post/persistent-neurological-symptoms-patient-survey)  
1462 [survey](https://www.react19.org/post/persistent-neurological-symptoms-patient-survey) (accessed 2022 Nov 30).  
1463  
1464 107 Safavi F, Gustafson L, Walitt B, Lehky T, Dehbashi S, Wiebold A, et al.  
1465 Neuropathic symptoms with SARS-CoV-2 vaccination. medRxiv  
1466 2022.05.16.22274439; doi: <https://doi.org/10.1101/2022.05.16.22274439>.  
1467 <https://www.medrxiv.org/content/10.1101/2022.05.16.22274439v1>.  
1468  
1469 108 Mehlsen J, Brinth L, Pors K, Varming K, Wallukat G, Olsen RKJ. Autoimmunity  
1470 in patients reporting long-term complications after exposure to human  
1471 papilloma virus vaccination. J Autoimmun 2022;133:102921. doi:  
1472 10.1016/j.jaut.2022.102921.  
1473 [https://www.sciencedirect.com/science/article/abs/pii/S0896841122001299?](https://www.sciencedirect.com/science/article/abs/pii/S0896841122001299?via%3DiHub)  
1474 [via%3DiHub](https://www.sciencedirect.com/science/article/abs/pii/S0896841122001299?via%3DiHub).  
1475  
1476 109 Kedor C, Freitag H, Meyer-Arndt L, Wittke K, Hanitsch LG, Zoller T, et al. A  
1477 prospective observational study of post-COVID-19 chronic fatigue syndrome  
1478 following the first pandemic wave in Germany and biomarkers associated with  
1479 symptom severity. Nat Commun 2022;13:5104. doi: 10.1038/s41467-022-  
1480 32507-6. <https://www.ncbi.nlm.nih.gov/pmc/articles/PMC9426365/>.  
1481  
1482 110 Wallukat G, Hohberger B, Wenzel K, Fürst J, Schulze-Rothe S, Wallukat A, et  
1483 al. Functional autoantibodies against G-protein coupled receptors in patients  
1484 with persistent Long-COVID-19 symptoms. J Transl Autoimmun 2021;4:100100.  
1485 doi: 10.1016/j.jtauto.2021.100100.  
1486 <https://www.ncbi.nlm.nih.gov/pmc/articles/PMC8049853/>.  
1487  
1488 111 Román GC, Gracia F, Torres A, Palacios A, Gracia K, Harris D. Acute  
1489 Transverse Myelitis (ATM): Clinical Review of 43 Patients With COVID-19-



- 1490 Associated ATM and 3 Post-Vaccination ATM Serious Adverse Events With the  
1491 ChAdOx1 nCoV-19 Vaccine (AZD 1222). *Front Immunol* 2021;12:653786. DOI:  
1492 [10.3389/fimmu.2021.653786](https://doi.org/10.3389/fimmu.2021.653786).  
1493
- 1494 112 Onakpoya IJ. Rare adverse events in clinical trials: understanding the rule of  
1495 three. *BMJ Evid Based Med* 2018;23:6. DOI: [10.1136/ebmed-2017-110885](https://doi.org/10.1136/ebmed-2017-110885).  
1496
- 1497 113 Yousaf AR, Cortese MM, Taylor AW, Broder KR, Oster ME, Wong JM, et al.  
1498 Reported cases of multisystem inflammatory syndrome in children aged 12-20  
1499 years in the USA who received a COVID-19 vaccine, December, 2020, through  
1500 August, 2021: a surveillance investigation. *Lancet Child Adolesc Health*  
1501 2022;6:303-12. doi: 10.1016/S2352-4642(22)00028-1.  
1502 [https://www.thelancet.com/journals/lanchi/article/PIIS2352-4642\(22\)00028-](https://www.thelancet.com/journals/lanchi/article/PIIS2352-4642(22)00028-1/fulltext)  
1503 [1/fulltext](https://www.thelancet.com/journals/lanchi/article/PIIS2352-4642(22)00028-1/fulltext).  
1504
- 1505 114 Benn CS, Fisker AB, Aaby P (eds.). *Bandim Health Project, 1978-2018. Forty*  
1506 *years of contradicting conventional wisdom*. København: Statens Seruminstitut  
1507 2018. [https://www2.bandim.dk/wp-content/uploads/2021/03/Jubilumsbog-](https://www2.bandim.dk/wp-content/uploads/2021/03/Jubilumsbog-2018.pdf)  
1508 [2018.pdf](https://www2.bandim.dk/wp-content/uploads/2021/03/Jubilumsbog-2018.pdf) (accessed 2022 Nov 30).  
1509
- 1510 115 Demasi M. FDA urged to publish follow-up studies on covid-19 vaccine  
1511 safety signals. *BMJ* 2022;379:o2527. doi: <https://doi.org/10.1136/bmj.o2527>.  
1512
- 1513 116 Montano D. Frequency and associations of adverse reactions of COVID-19  
1514 vaccines reported to pharmacovigilance systems in the European Union and the  
1515 United States. *Front Public Health* 2022;9:756633.  
1516 <https://www.frontiersin.org/articles/10.3389/fpubh.2021.756633/full>.  
1517
